# Supplementary material for: Physalins V-IX, 16,24-cyclo-13,14-seco withanolides from Physalis angulata and their antiproliferative and anti-inflammatory activities
Source: PubMed Central journal article supplement (PMC5481415; doi:10.1038/s41598-017-03849-9), 2017-06-22
Supplement: 41598_2017_3849_MOESM1_ESM.pdf [file 41598_2017_3849_MOESM1_ESM.pdf]

## Supplementary information

### **Physalins V-IX, 16,24-cyclo-13,14-seco withanolides from *Physalis angulata* and their antiproliferative and anti-inflammatory activities**

Cheng-Peng Sun<sup>1,2</sup>, Chong-Yue Qiu<sup>2</sup>, Feng Zhao<sup>3</sup>, Ning Kang<sup>1</sup>,

Li-Xia Chen<sup>2\*</sup>, Feng Qiu<sup>1,2\*</sup>

#### **List of supplementary information**

**Supplementary Figure S1.** <sup>1</sup>H NMR spectrum of **1** (600 MHz, DMSO-*d*<sub>6</sub>)

**Supplementary Figure S2.** <sup>13</sup>C NMR spectrum of **1** (150 MHz, DMSO-*d*<sub>6</sub>)

**Supplementary Figure S3.** HSQC spectrum of **1** (600 MHz, DMSO-*d*<sub>6</sub>)

**Supplementary Figure S4.** HMBC spectrum of **1** (600 MHz, DMSO-*d*<sub>6</sub>)

**Supplementary Figure S5.** Selected HMBC spectrum of **1** (600 MHz, DMSO-*d*<sub>6</sub>)

**Supplementary Figure S6.** NOESY spectrum of **1** (600 MHz, DMSO-*d*<sub>6</sub>)

**Supplementary Figure S7.** Selected NOESY spectrum of **1** (600 MHz, DMSO-*d*<sub>6</sub>)

**Supplementary Figure S8.** HRESIMS spectrum of **1**

**Supplementary Figure S9.** IR spectrum of **1**

**Supplementary Figure S10.** <sup>1</sup>H NMR spectrum of **2** (400 MHz, DMSO-*d*<sub>6</sub>)

**Supplementary Figure S11.** <sup>13</sup>C NMR spectrum of **2** (100 MHz, DMSO-*d*<sub>6</sub>)

**Supplementary Figure S12.** HSQC spectrum of **2** (600 MHz, DMSO-*d*<sub>6</sub>)

**Supplementary Figure S13.** HMBC spectrum of **2** (600 MHz, DMSO-*d*<sub>6</sub>)

**Supplementary Figure S14.** Selected HMBC spectrum of **2** (600 MHz, DMSO-*d*<sub>6</sub>)

**Supplementary Figure S15.** NOESY spectrum of **2** (600 MHz, DMSO-*d*<sub>6</sub>)

**Supplementary Figure S16.** Selected NOESY spectrum of **2** (600 MHz, DMSO-*d*<sub>6</sub>)

**Supplementary Figure S17.** HRESIMS spectrum of **2**

**Supplementary Figure S18.** IR spectrum of **2**

**Supplementary Figure S19.** <sup>1</sup>H NMR spectrum of **3** (400 MHz, DMSO-*d*<sub>6</sub>)

**Supplementary Figure S20.**  $^{13}\text{C}$  NMR spectrum of **3** (100 MHz,  $\text{DMSO-}d_6$ )

**Supplementary Figure S21.** HSQC spectrum of **3** (600 MHz,  $\text{DMSO-}d_6$ )

**Supplementary Figure S22.** HMBC spectrum of **3** (600 MHz,  $\text{DMSO-}d_6$ )

**Supplementary Figure S23.** Selected HMBC spectrum of **3** (600 MHz,  $\text{DMSO-}d_6$ )

**Supplementary Figure S24.** NOESY spectrum of **3** (600 MHz,  $\text{DMSO-}d_6$ )

**Supplementary Figure S25.** Selected NOESY spectrum of **3** (600 MHz,  $\text{DMSO-}d_6$ )

**Supplementary Figure S26.** HRESIMS spectrum of **3**

**Supplementary Figure S27.** IR spectrum of **3**

**Supplementary Figure S28.**  $^1\text{H}$  NMR spectrum of **4** (600 MHz,  $\text{DMSO-}d_6$ )

**Supplementary Figure S29.**  $^{13}\text{C}$  NMR spectrum of **4** (150 MHz,  $\text{DMSO-}d_6$ )

**Supplementary Figure S30.** HSQC spectrum of **4** (600 MHz,  $\text{DMSO-}d_6$ )

**Supplementary Figure S31.** HMBC spectrum of **4** (600 MHz,  $\text{DMSO-}d_6$ )

**Supplementary Figure S32.** Selected HMBC spectrum of **4** (600 MHz,  $\text{DMSO-}d_6$ )

**Supplementary Figure S33.** NOESY spectrum of **4** (600 MHz,  $\text{DMSO-}d_6$ )

**Supplementary Figure S34.** Selected NOESY spectrum of **4** (600 MHz,  $\text{DMSO-}d_6$ )

**Supplementary Figure S35.** HRESIMS spectrum of **4**

**Supplementary Figure S36.** IR spectrum of **4**

**Supplementary Figure S37.**  $^1\text{H}$  NMR spectrum of **5** (400 MHz,  $\text{DMSO-}d_6$ )

**Supplementary Figure S38.**  $^{13}\text{C}$  NMR spectrum of **5** (100 MHz,  $\text{DMSO-}d_6$ )

**Supplementary Figure S39.** HSQC spectrum of **5** (600 MHz,  $\text{DMSO-}d_6$ )

**Supplementary Figure S40.** HMBC spectrum of **5** (600 MHz,  $\text{DMSO-}d_6$ )

**Supplementary Figure S41.** Selected HMBC spectrum of **5** (600 MHz,  $\text{DMSO-}d_6$ )

**Supplementary Figure S42.** NOESY spectrum of **5** (600 MHz,  $\text{DMSO-}d_6$ )

**Supplementary Figure S43.** Selected NOESY spectrum of **5** (600 MHz,  $\text{DMSO-}d_6$ )

**Supplementary Figure S44.** MS spectrum (A, negative mode; B, positive mode) of the hydrolyzed product for **5**

**Supplementary Figure S45.** HRESIMS spectrum of **5**

**Supplementary Figure S46.** IR spectrum of **5**

**Supplementary Figure S47.**  $^1\text{H}$  NMR spectrum of **6** (600 MHz,  $\text{DMSO-}d_6$ )

**Supplementary Figure S48.**  $^{13}\text{C}$  NMR spectrum of **6** (150 MHz,  $\text{DMSO-}d_6$ )

**Supplementary Figure S49.** HSQC spectrum of **6** (600 MHz, DMSO-*d*<sub>6</sub>)

**Supplementary Figure S50.** HMBC spectrum of **6** (600 MHz, DMSO-*d*<sub>6</sub>)

**Supplementary Figure S51.** Selected HMBC spectrum of **6** (600 MHz, DMSO-*d*<sub>6</sub>)

**Supplementary Figure S52.** NOESY spectrum of **6** (600 MHz, DMSO-*d*<sub>6</sub>)

**Supplementary Figure S53.** Selected NOESY spectrum of **6** (600 MHz, DMSO-*d*<sub>6</sub>)

**Supplementary Figure S54.** HRESIMS spectrum of **6**

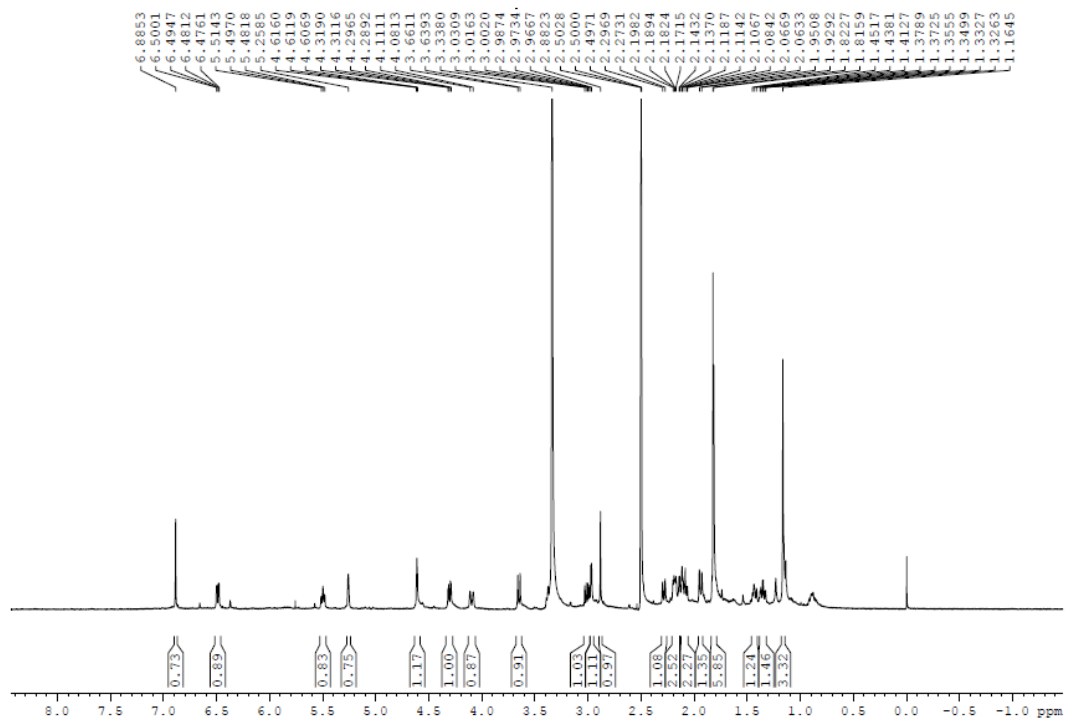

**Supplementary Figure S1.** <sup>1</sup>H NMR spectrum of **1** (600 MHz, DMSO-*d*<sub>6</sub>)

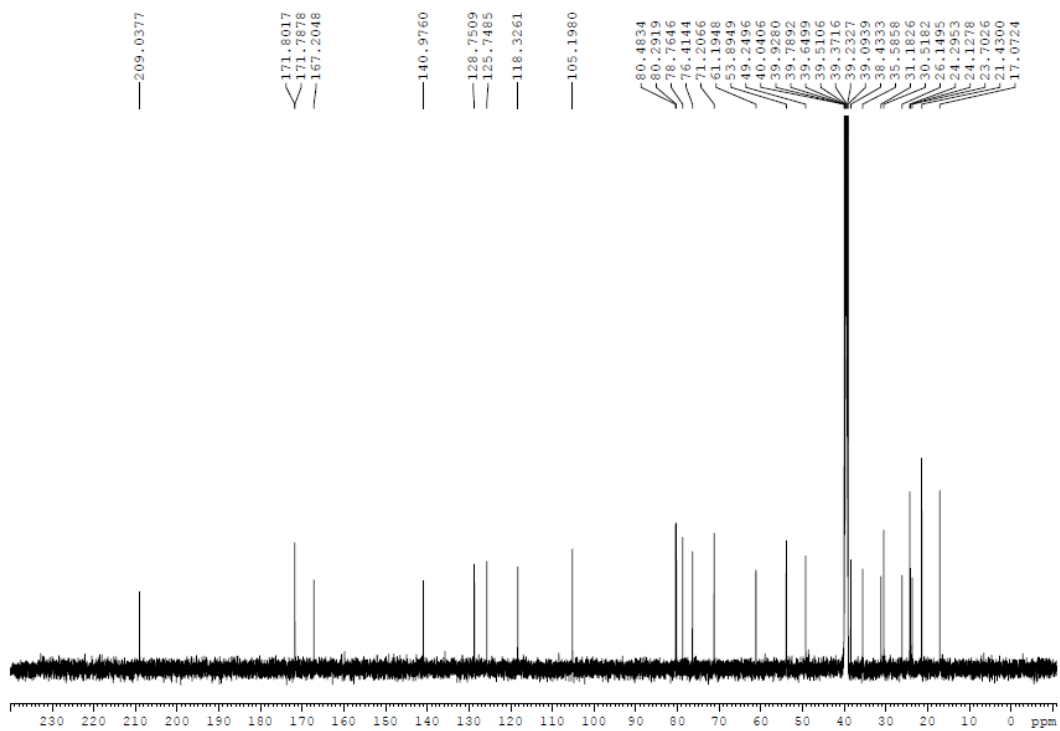

Supplementary Figure S2.  $^{13}\text{C}$  NMR spectrum of **1** (150 MHz,  $\text{DMSO-}d_6$ )

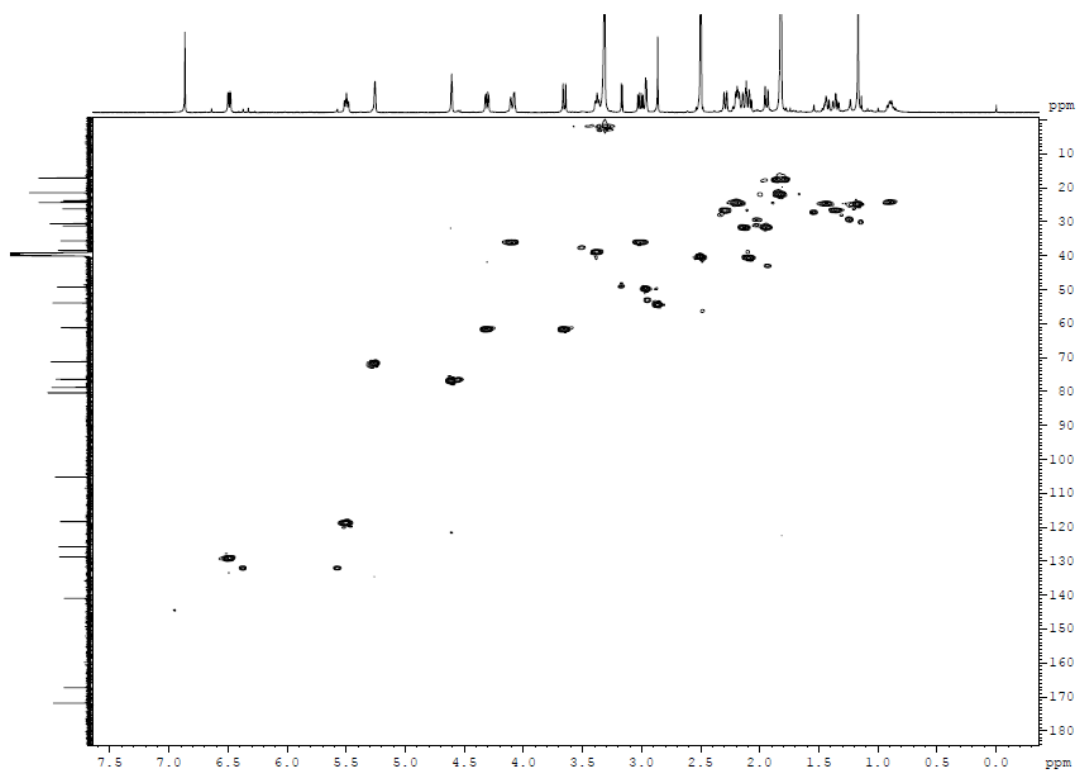

**Supplementary Figure S3.** HSQC spectrum of **1** (600 MHz, DMSO-*d*<sub>6</sub>)

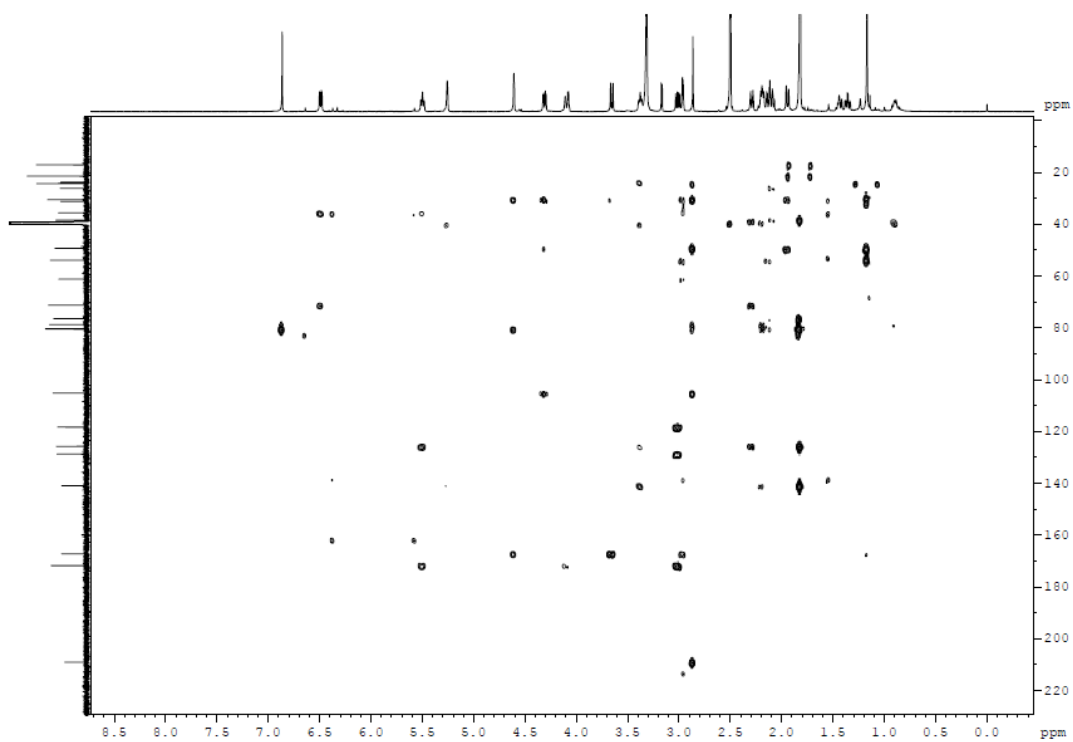

**Supplementary Figure S4.** HMBC spectrum of **1** (600 MHz, DMSO-*d*<sub>6</sub>)

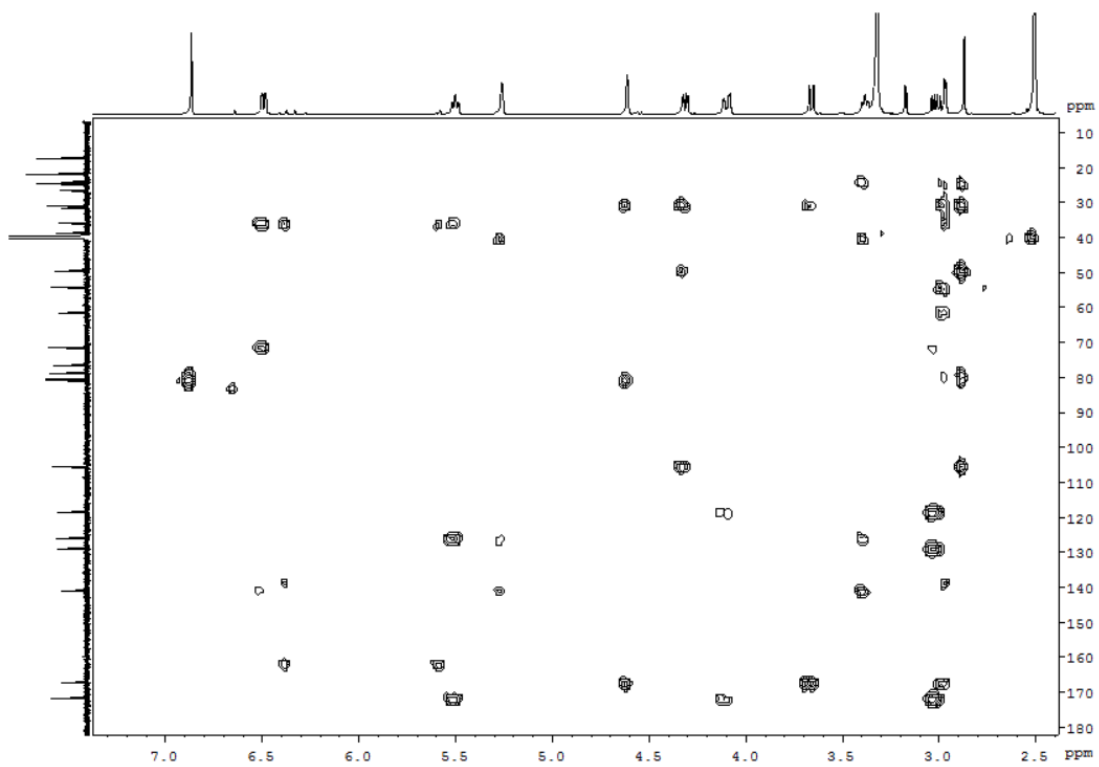

**Supplementary Figure S5.** Selected HMBC spectrum of **1** (600 MHz, DMSO-*d*<sub>6</sub>)

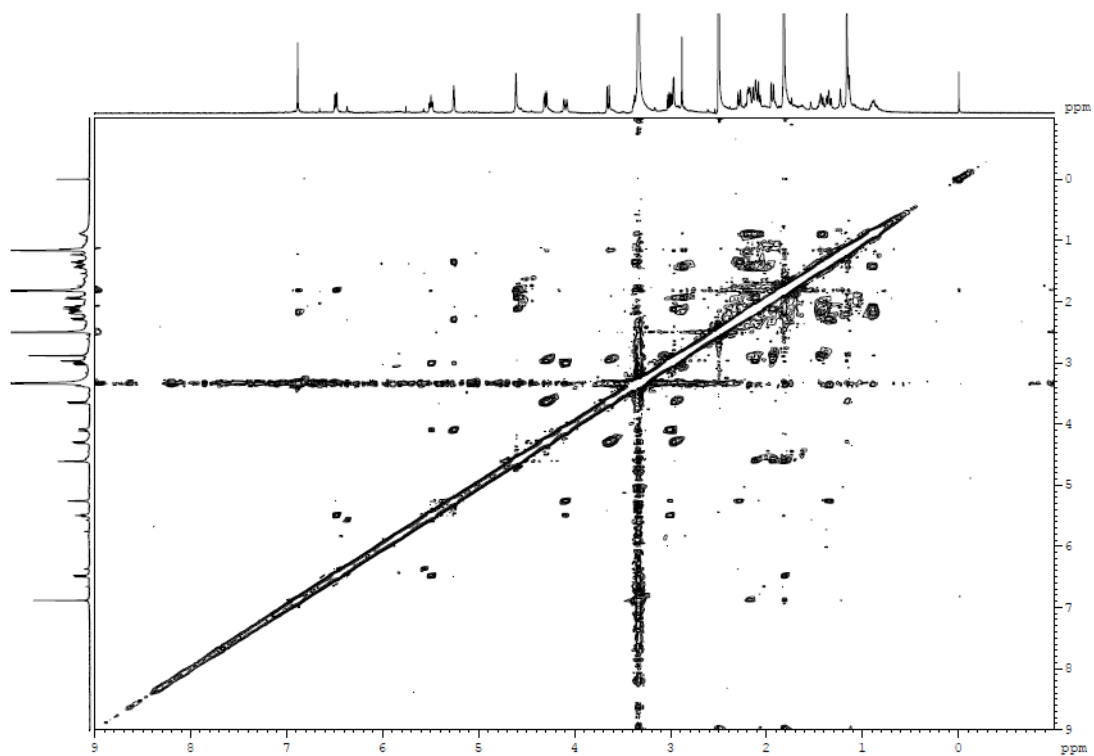

**Supplementary Figure S6.** NOESY spectrum of **1** (600 MHz, DMSO-*d*<sub>6</sub>)

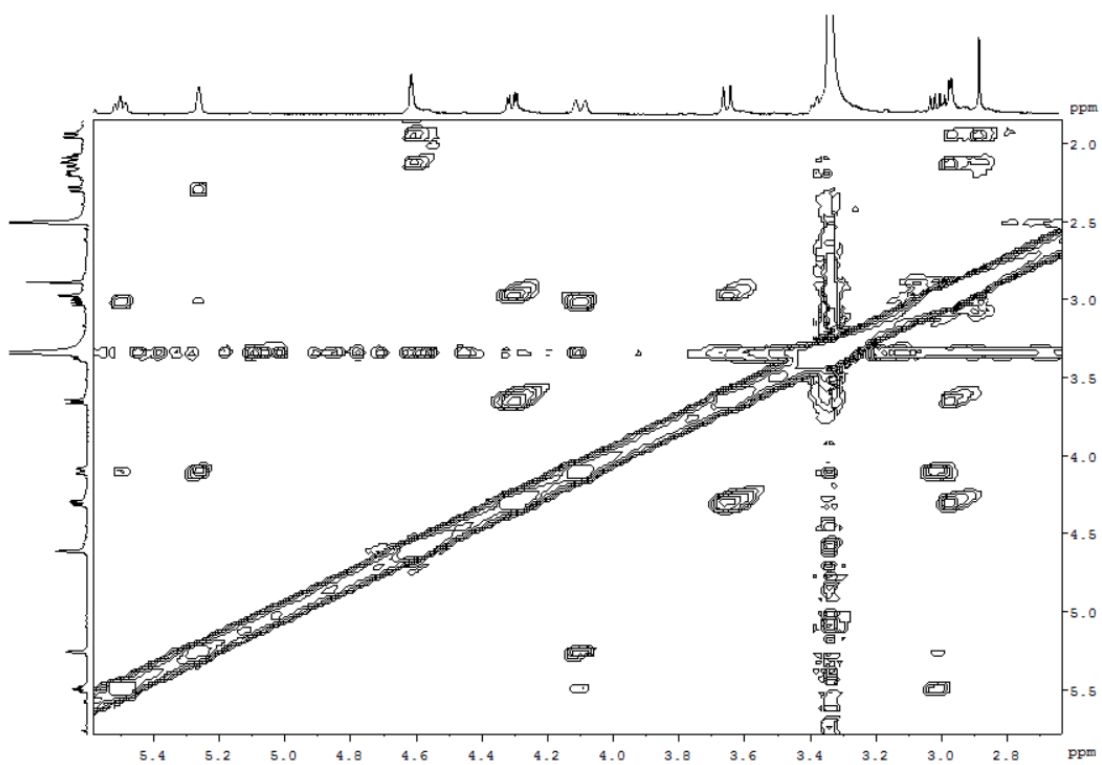

**Supplementary Figure S7.** Selected NOESY spectrum of **1** (600 MHz, DMSO-



## User Chromatograms

### User Spectra

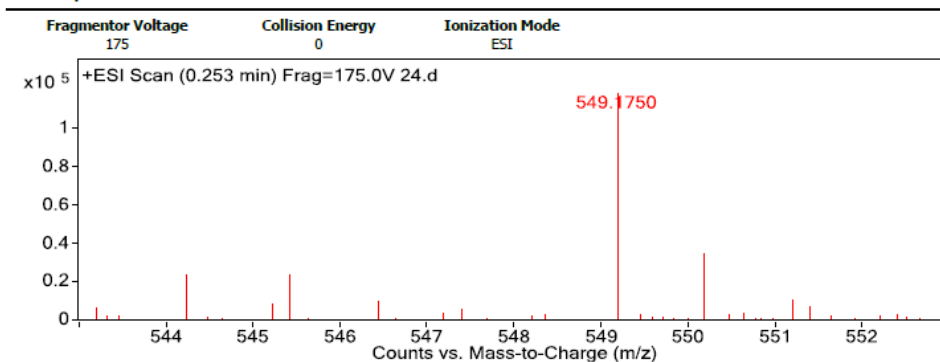

#### Formula Calculator Results

| Formula                                         | Best | Mass     | Tgt Mass | Diff (ppm) | Ion Species                                       | Score |
|-------------------------------------------------|------|----------|----------|------------|---------------------------------------------------|-------|
| C <sub>28</sub> H <sub>30</sub> O <sub>10</sub> | TRUE | 526.1857 | 526.1839 | -3.52      | C <sub>28</sub> H <sub>30</sub> NaO <sub>10</sub> | 89.71 |

--- End Of Report ---

## Supplementary Figure S8. HRESIMS spectrum of 1

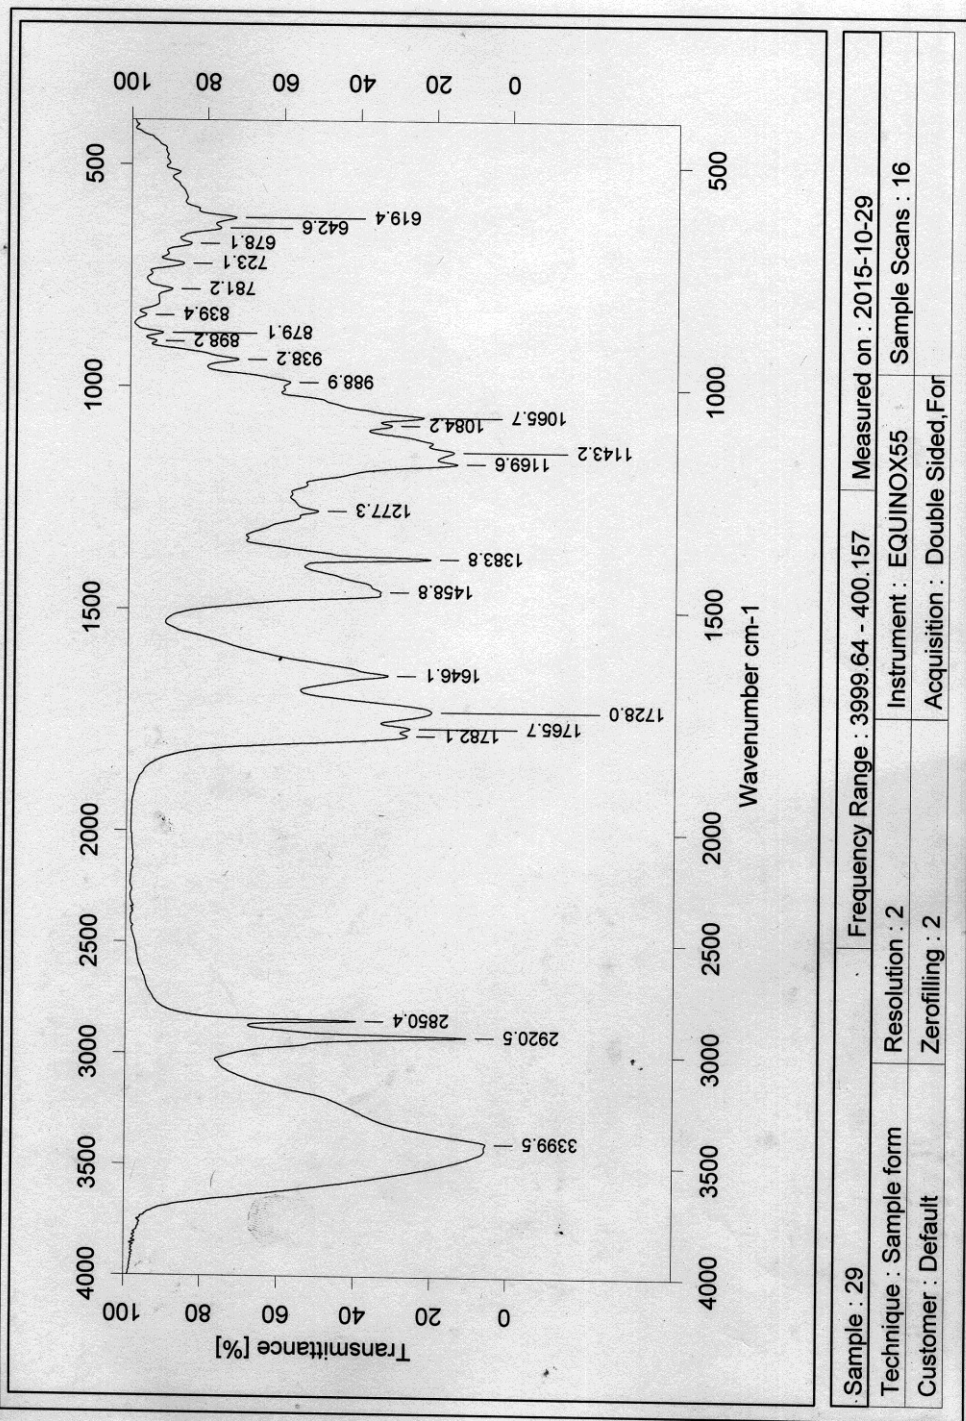

Supplementary Figure S9. IR spectrum of 1

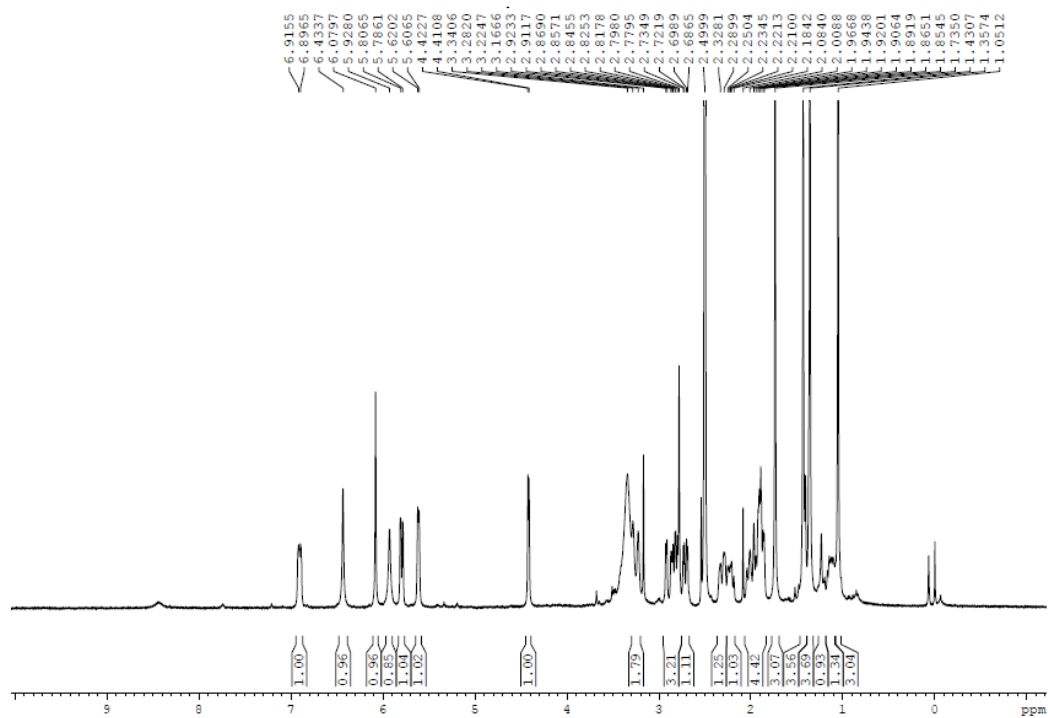

Supplementary Figure S10.  $^1\text{H}$  NMR spectrum of **2** (400 MHz,  $\text{DMSO-}d_6$ )

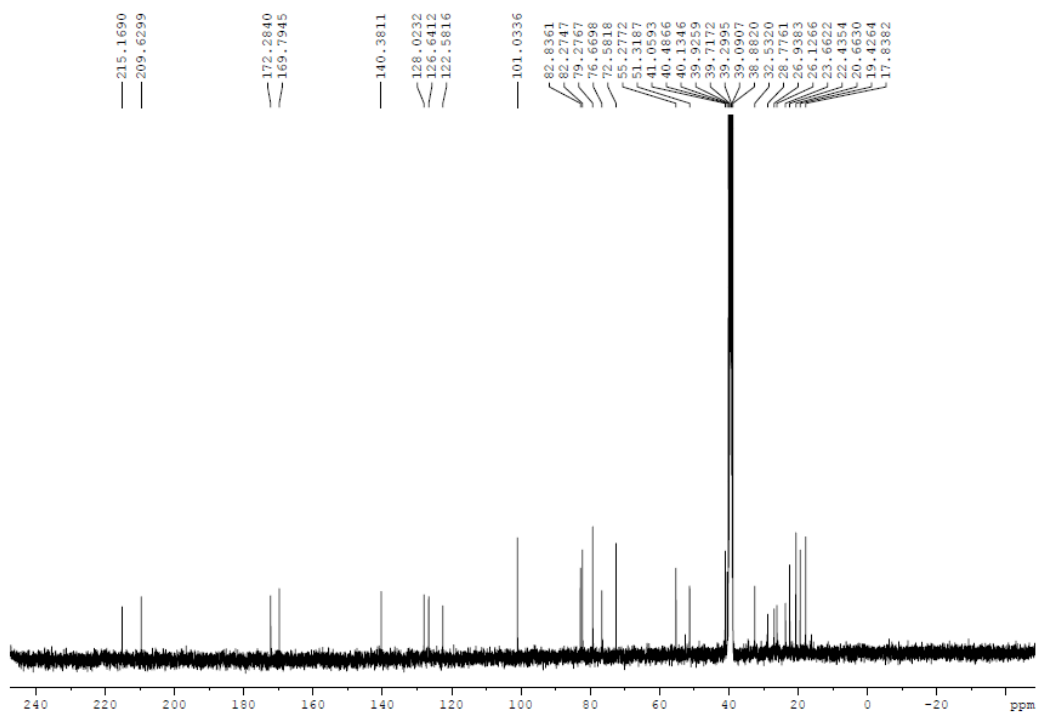

Supplementary Figure S11.  $^{13}\text{C}$  NMR spectrum of **2** (100 MHz,  $\text{DMSO-}d_6$ )

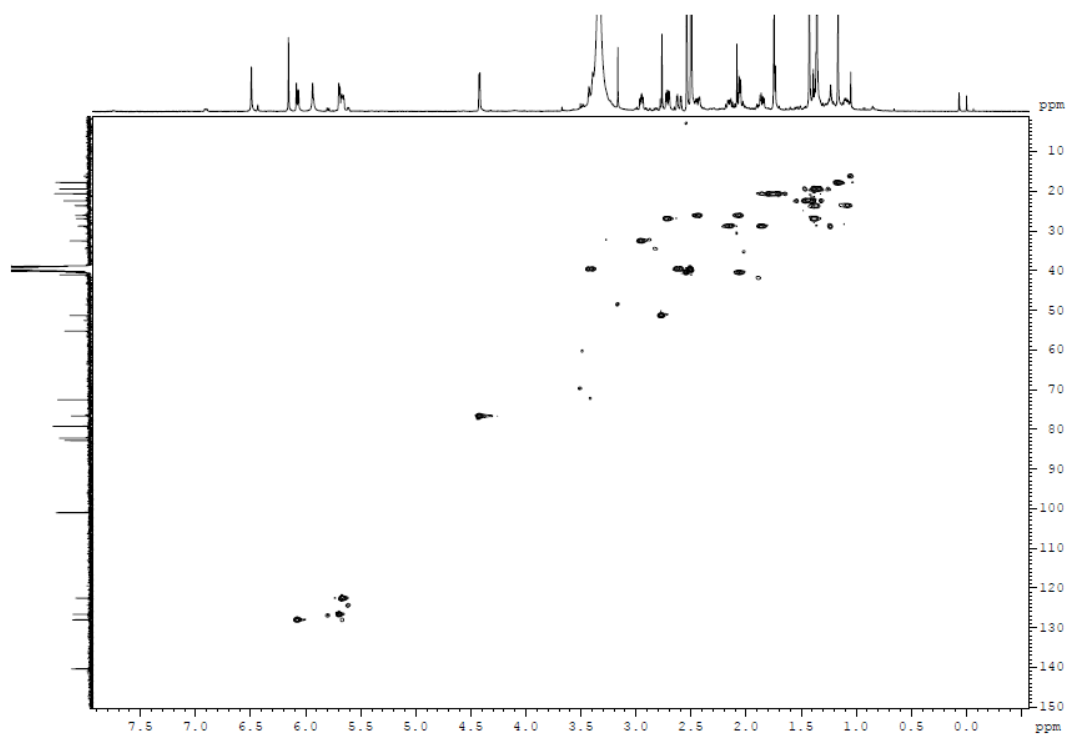

**Supplementary Figure S12.** HSQC spectrum of **2** (600 MHz, DMSO-*d*<sub>6</sub>)

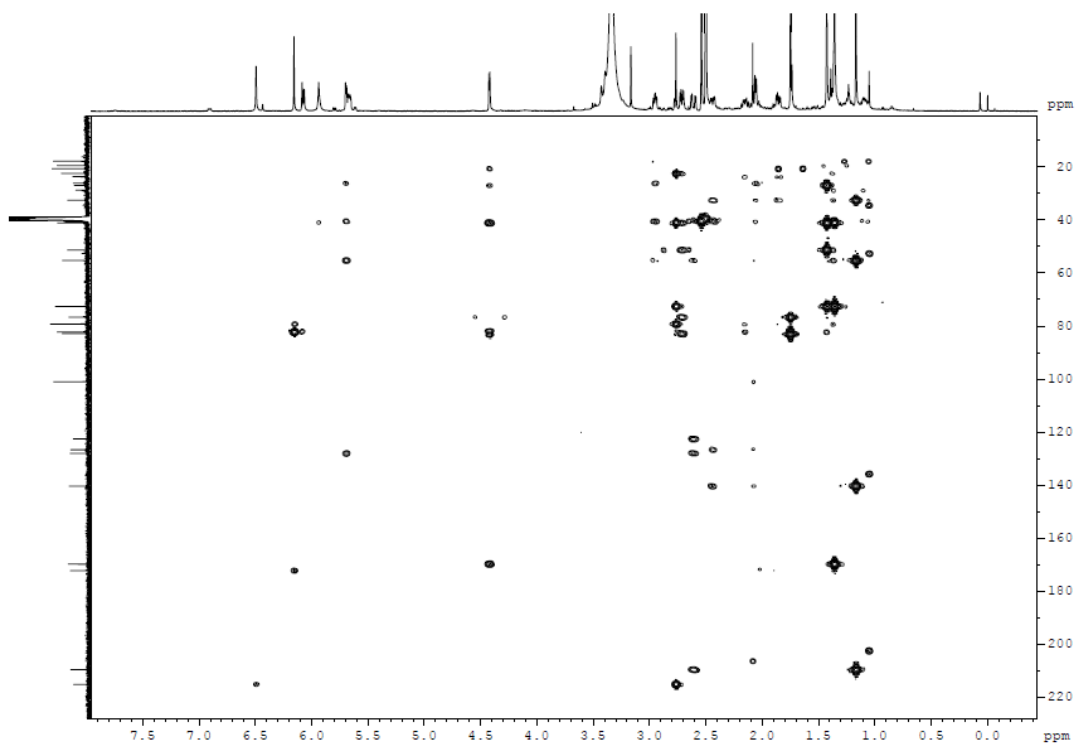

**Supplementary Figure S13.** HMBC spectrum of **2** (600 MHz, DMSO-*d*<sub>6</sub>)

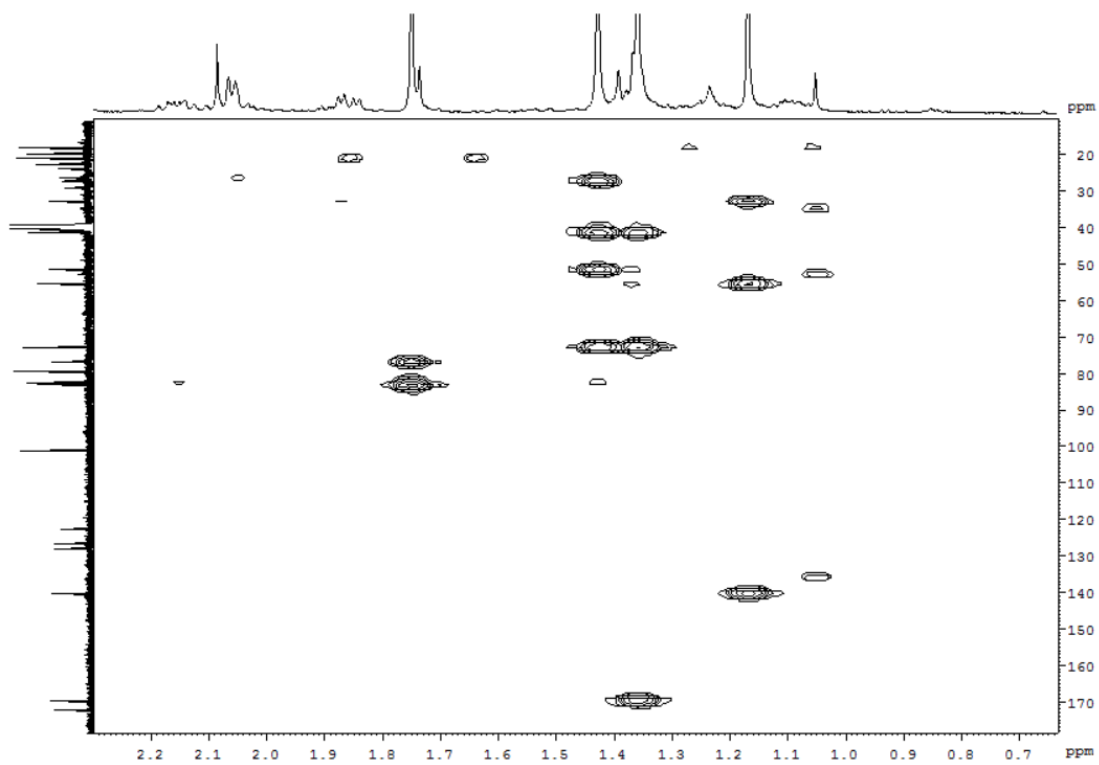

**Supplementary Figure S14.** Selected HMBC spectrum of **2** (600 MHz, DMSO-*d*<sub>6</sub>)

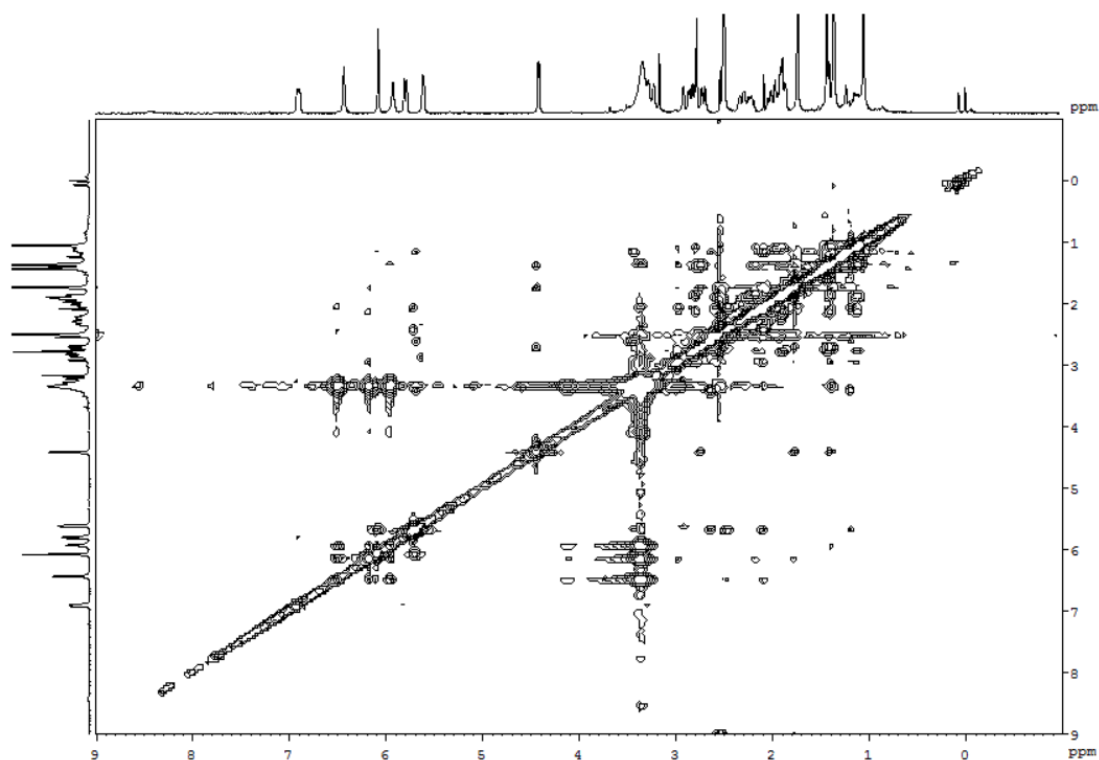

**Supplementary Figure S15.** NOESY spectrum of **2** (600 MHz, DMSO-*d*<sub>6</sub>)

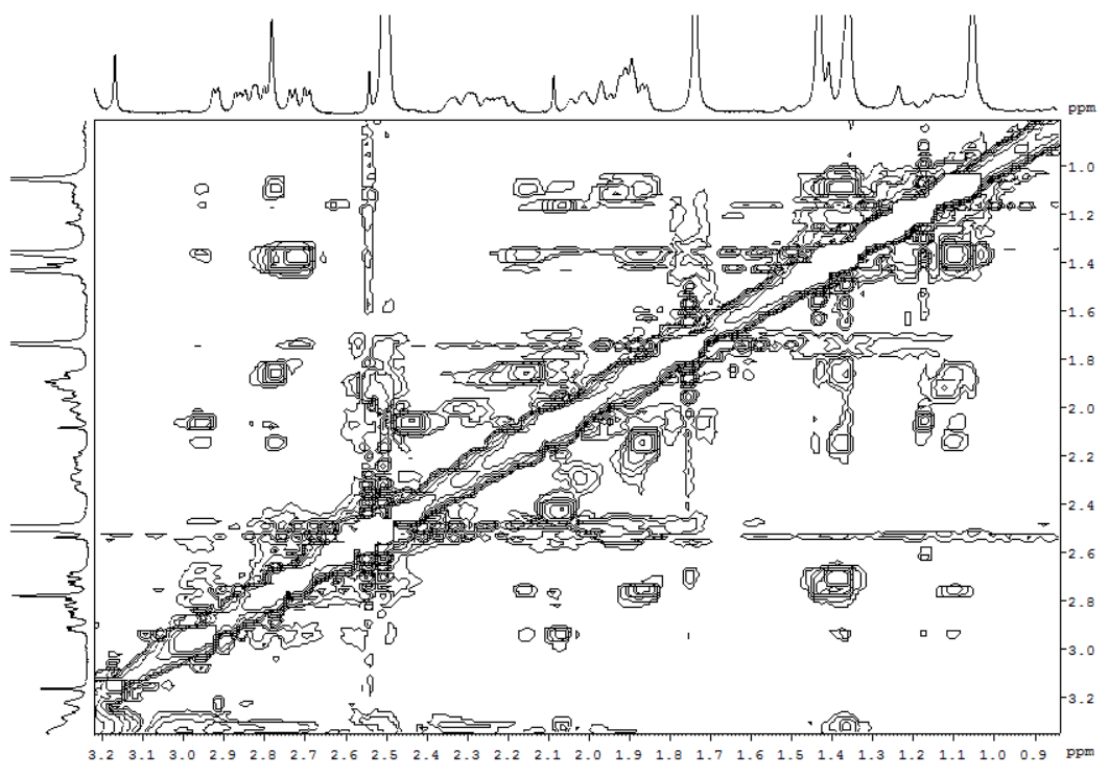

**Supplementary Figure S16.** Selected NOESY spectrum of **2** (600 MHz, DMSO-*d*<sub>6</sub>)

Tolerance = 2.1 PPM / DBE: min = 3.0, max = 50.0  
 Element prediction: Off  
 Number of isotope peaks used for i-FIT = 3

Monoisotopic Mass, Even Electron Ions  
 250 formula(e) evaluated with 1 results within limits (up to 50 closest results for each mass)  
 Elements Used:  
 C: 0-100 H: 0-100 O: 0-200 Na: 0-1  
 SCPs12 neg 49 (0.205)  
 1: TOF MS ES-

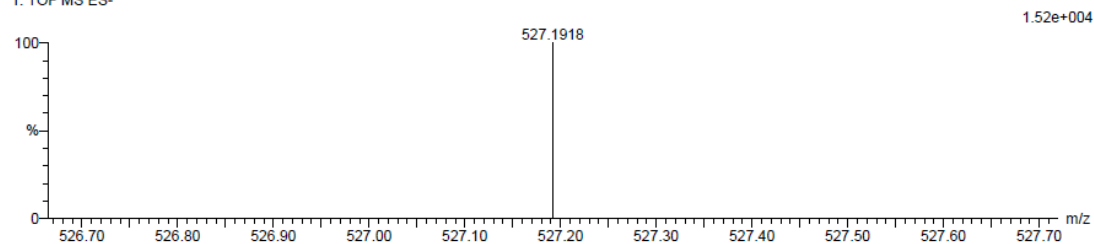

| Mass     | Calc. Mass | mDa | PPM | DBE  | i-FIT | Norm | Conf (%) | Formula                                         |
|----------|------------|-----|-----|------|-------|------|----------|-------------------------------------------------|
| 527.1918 | 527.1917   | 0.1 | 0.2 | 13.5 | 31.5  | n/a  | n/a      | C <sub>28</sub> H <sub>31</sub> O <sub>10</sub> |

**Supplementary Figure S17.** HRESIMS spectrum of **2**

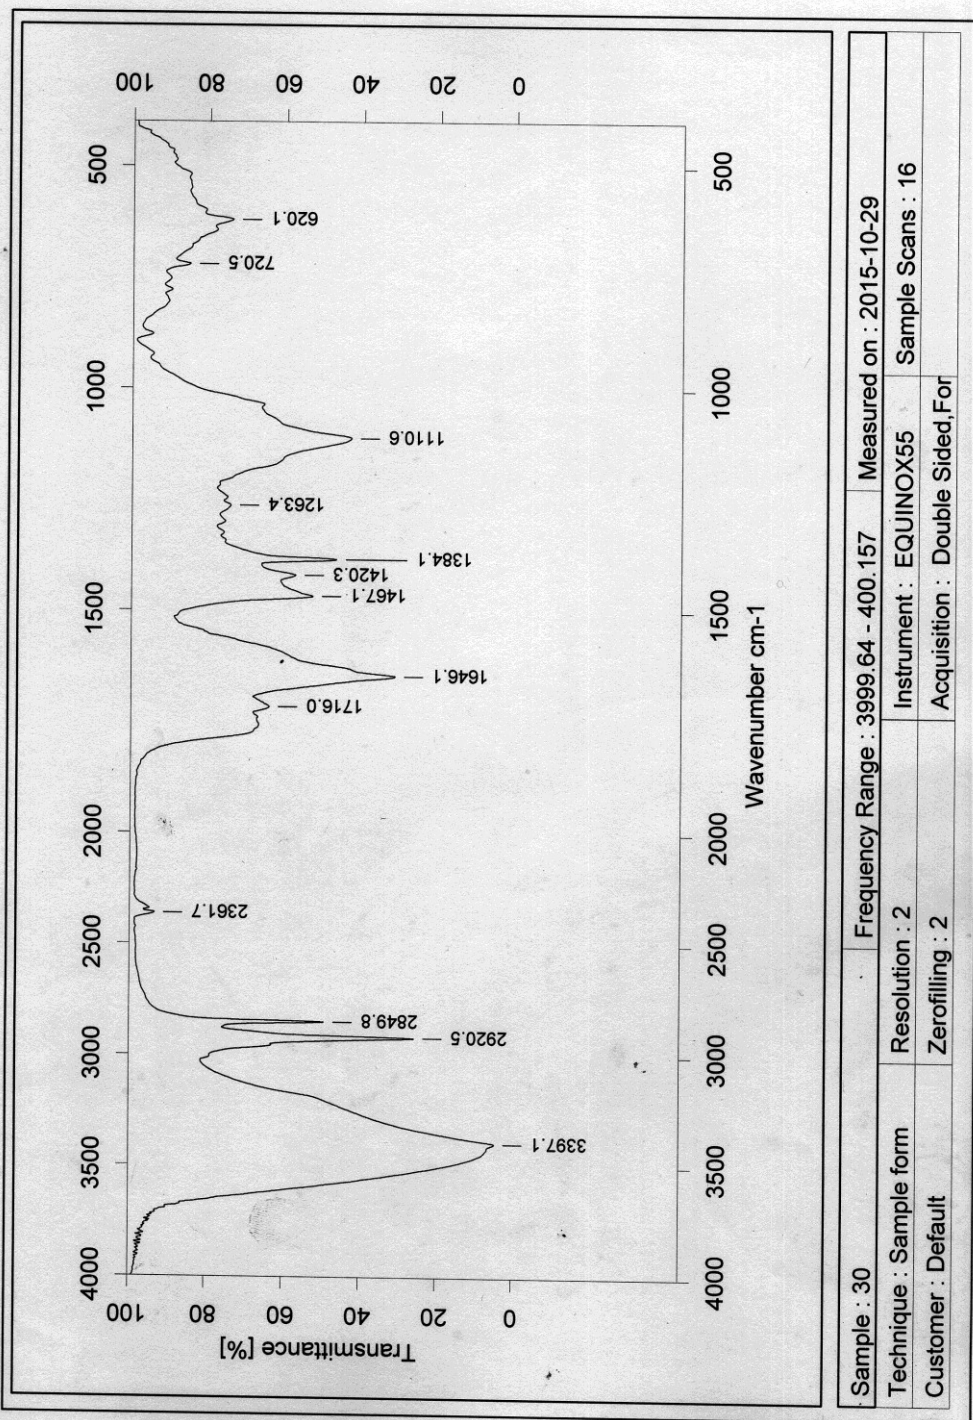

Supplementary Figure S18. IR spectrum of 2

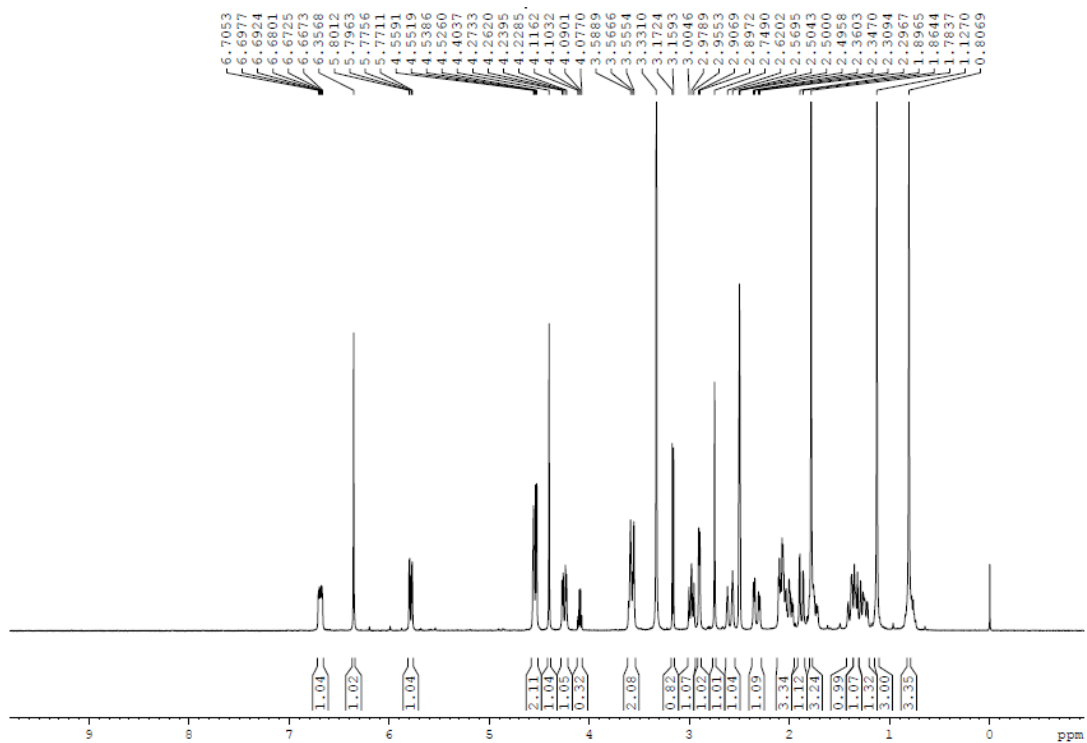

Supplementary Figure S19.  $^1\text{H}$  NMR spectrum of **3** (400 MHz,  $\text{DMSO-}d_6$ )

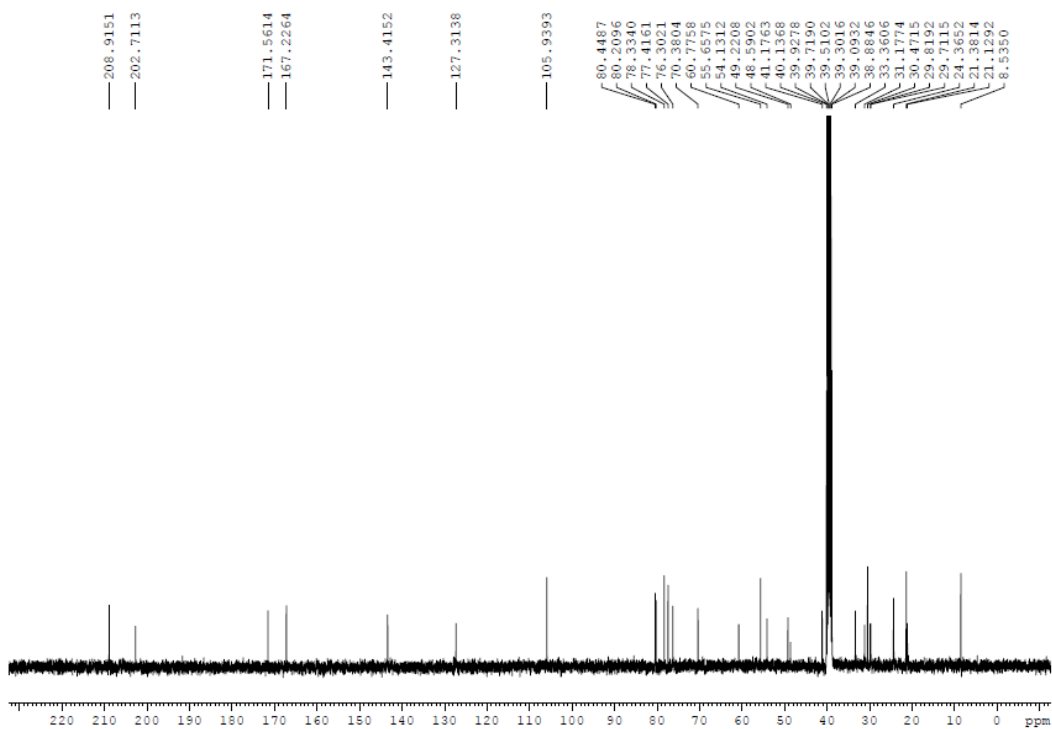

Supplementary Figure S20.  $^{13}\text{C}$  NMR spectrum of **3** (100 MHz,  $\text{DMSO-}d_6$ )



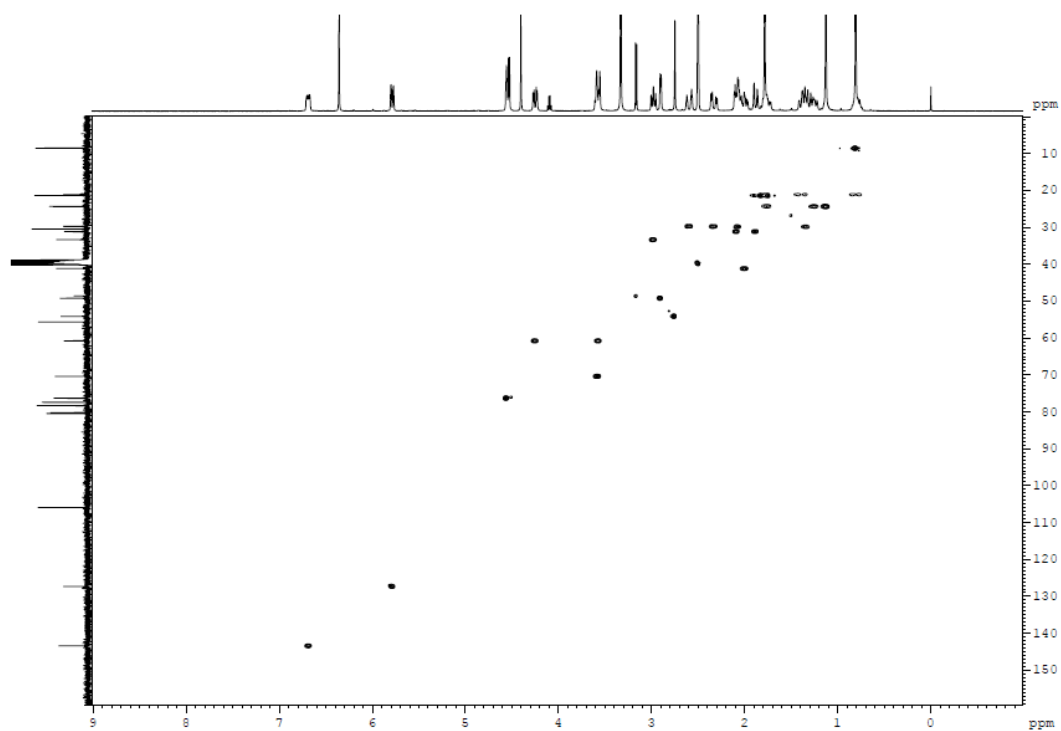

**Supplementary Figure S21.** HSQC spectrum of **3** (600 MHz, DMSO-*d*<sub>6</sub>)

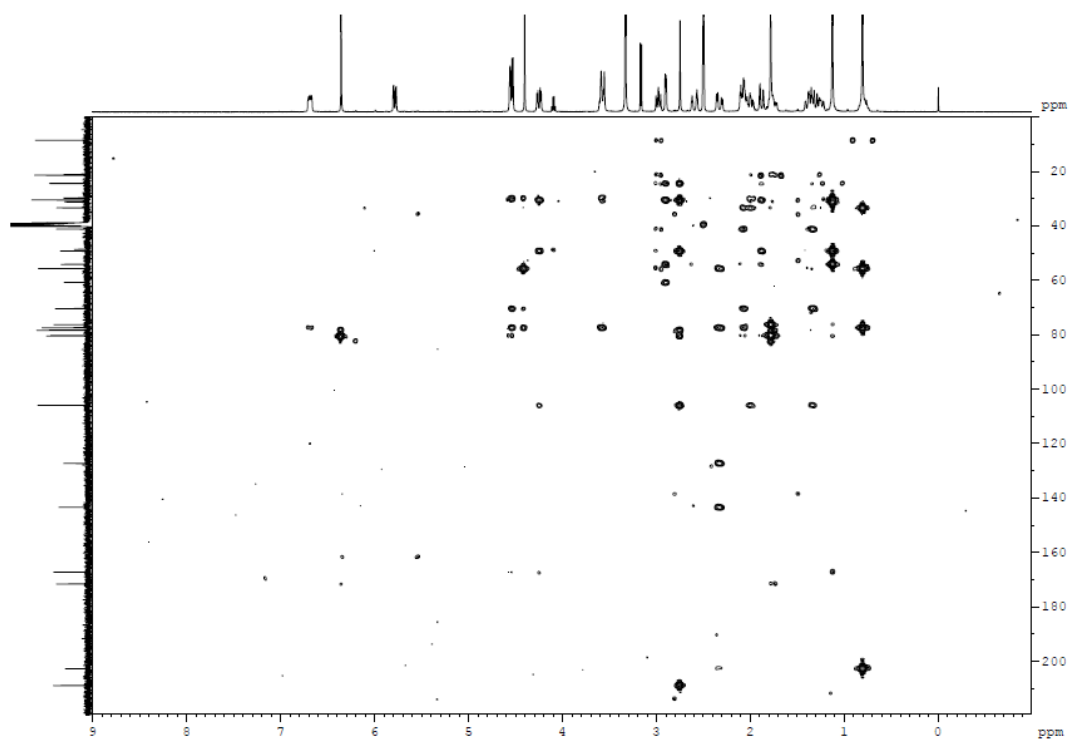

**Supplementary Figure S22.** HMBC spectrum of **3** (600 MHz, DMSO-*d*<sub>6</sub>)

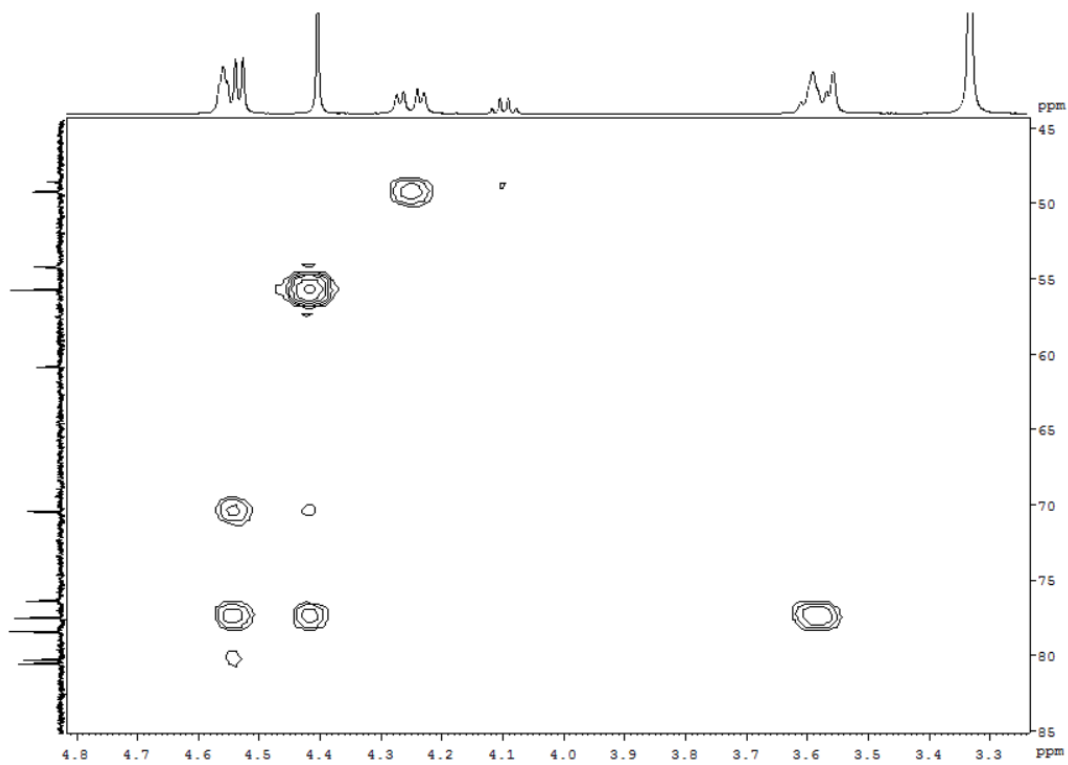

**Supplementary Figure S23.** Selected HMBC spectrum of **3** (600 MHz, DMSO-*d*<sub>6</sub>)

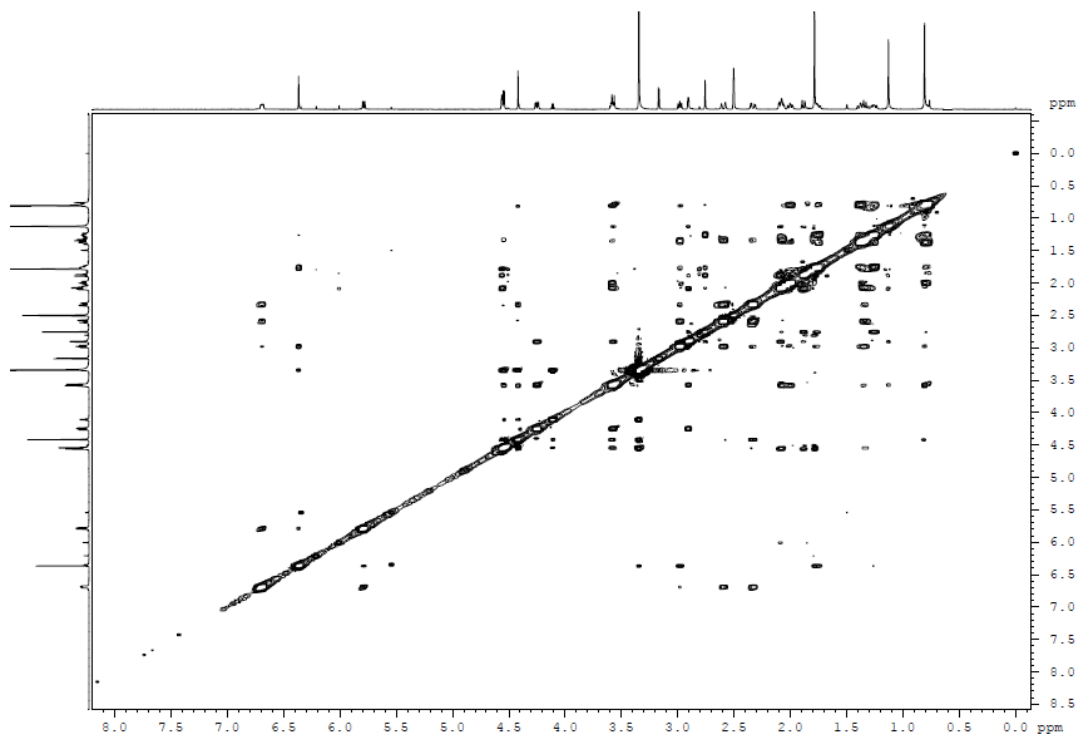

**Supplementary Figure S24.** NOESY spectrum of **3** (600 MHz, DMSO-*d*<sub>6</sub>)

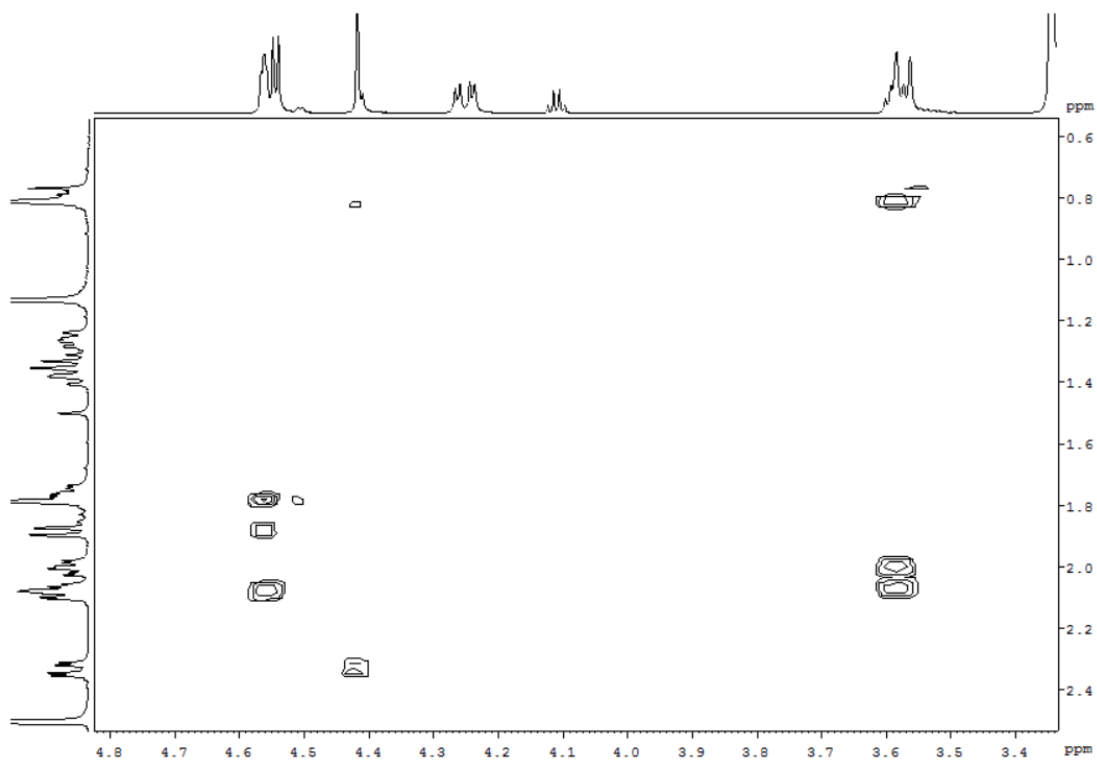

**Supplementary Figure S25.** Selected NOESY spectrum of **3** (600 MHz, DMSO-*d*<sub>6</sub>)

Tolerance = 2.0 PPM / DBE: min = 3.0, max = 50.0  
 Element prediction: Off  
 Number of isotope peaks used for i-FIT = 3

Monoisotopic Mass, Even Electron Ions  
 139 formula(e) evaluated with 1 results within limits (up to 50 closest results for each mass)  
 Elements Used:  
 C: 0-100 H: 0-100 O: 0-200  
 SCPs23 neg 41 (0.170) Cm (41:55)  
 1: TOF MS ES-

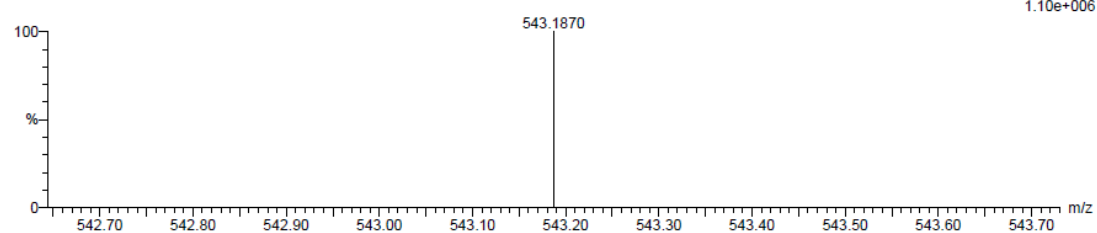

| Mass     | Calc. Mass | mDa | PPM | DBE  | i-FIT | Norm | Conf (%) | Formula                                         |
|----------|------------|-----|-----|------|-------|------|----------|-------------------------------------------------|
| 543.1870 | 543.1866   | 0.4 | 0.7 | 13.5 | 42.4  | n/a  | n/a      | C <sub>28</sub> H <sub>31</sub> O <sub>11</sub> |

**Supplementary Figure S26.** HRESIMS spectrum of **3**

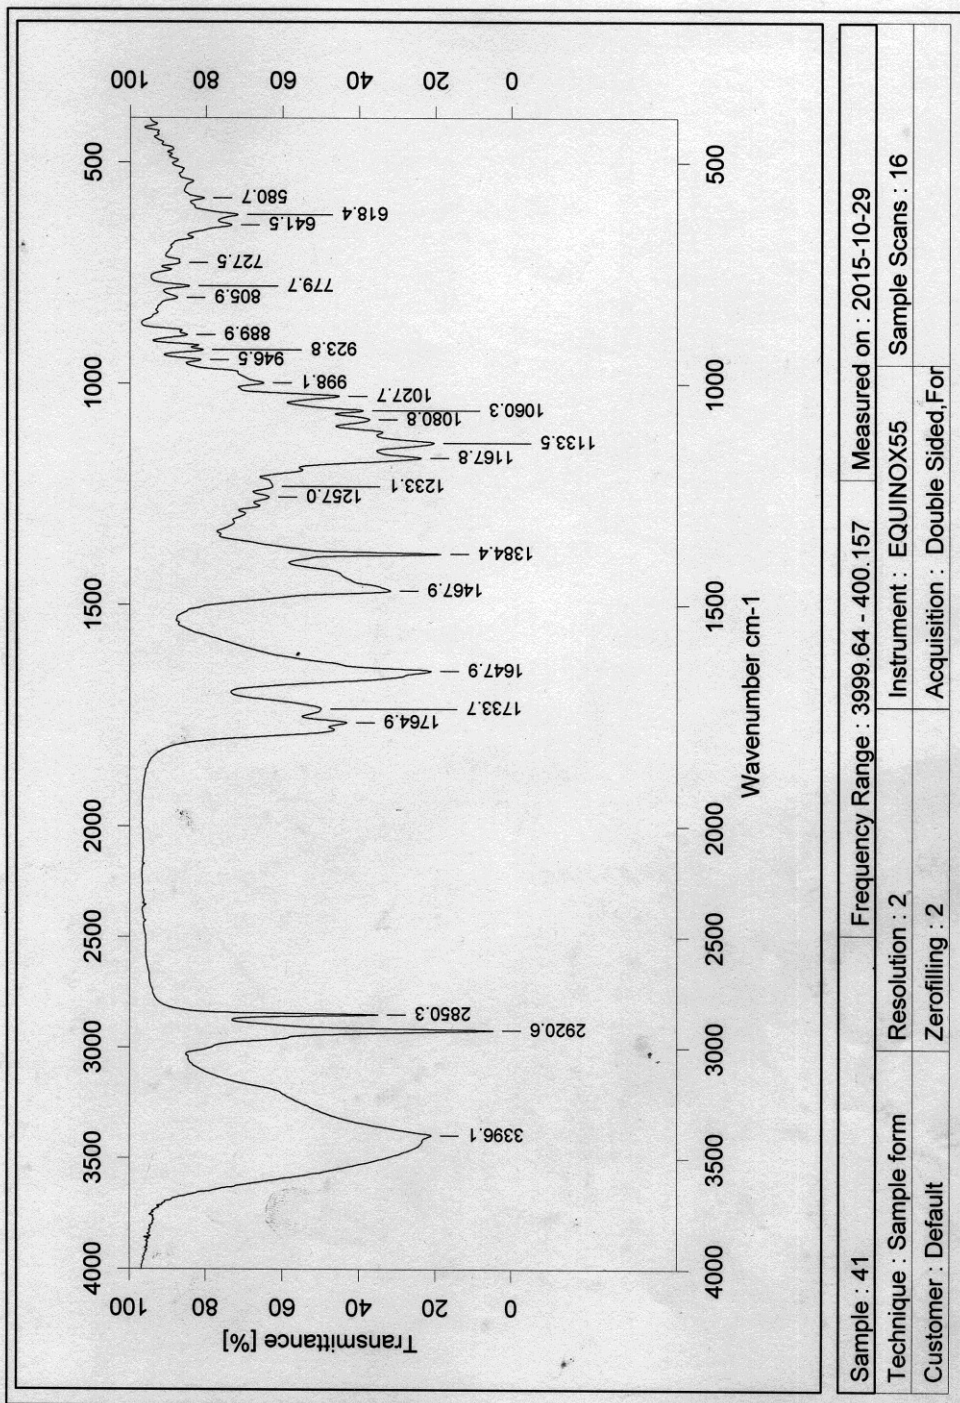

Supplementary Figure S27. IR spectrum of 3

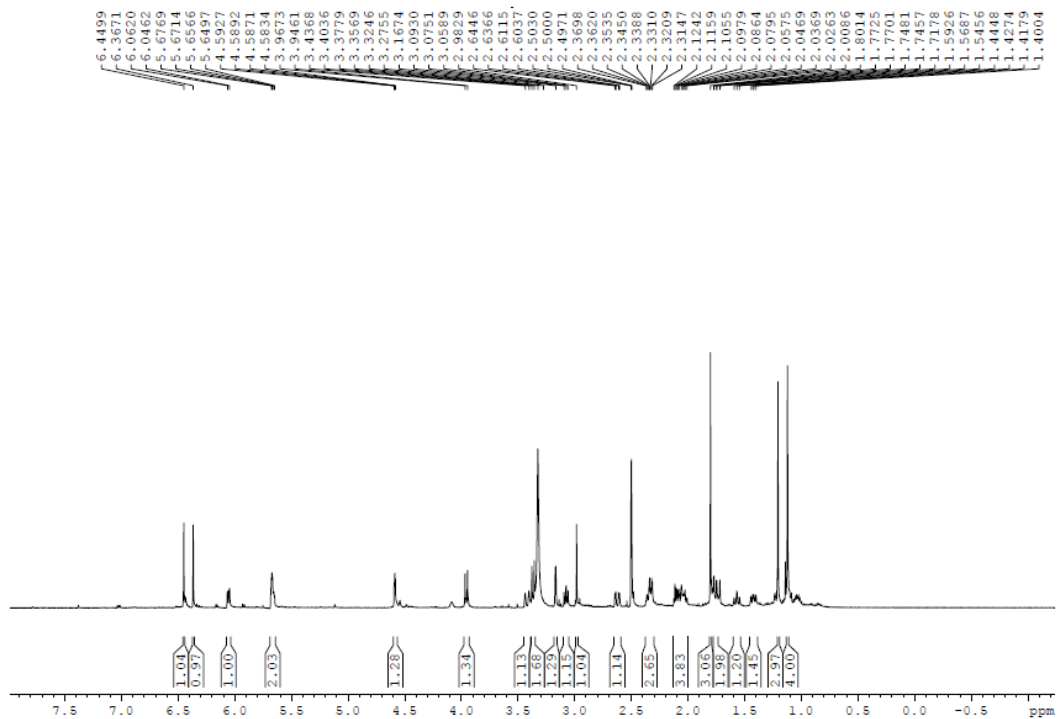

Supplementary Figure S28.  $^1\text{H}$  NMR spectrum of **4** (600 MHz,  $\text{DMSO-}d_6$ )

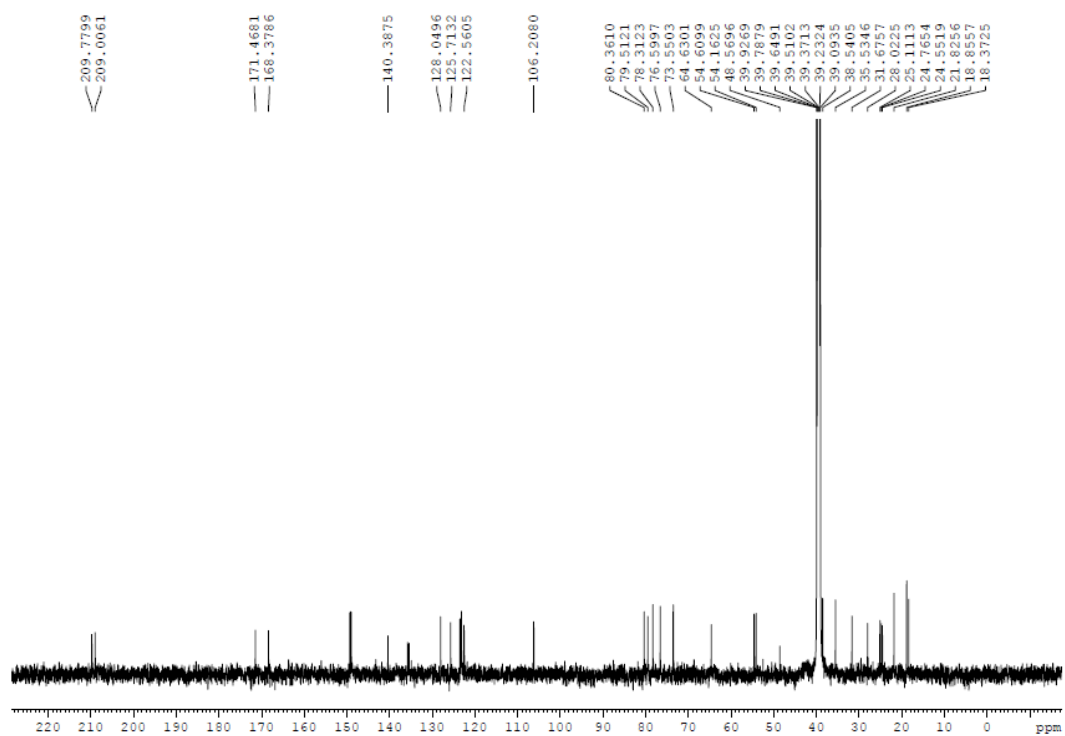

Supplementary Figure S29.  $^{13}\text{C}$  NMR spectrum of **4** (150 MHz,  $\text{DMSO-}d_6$ )

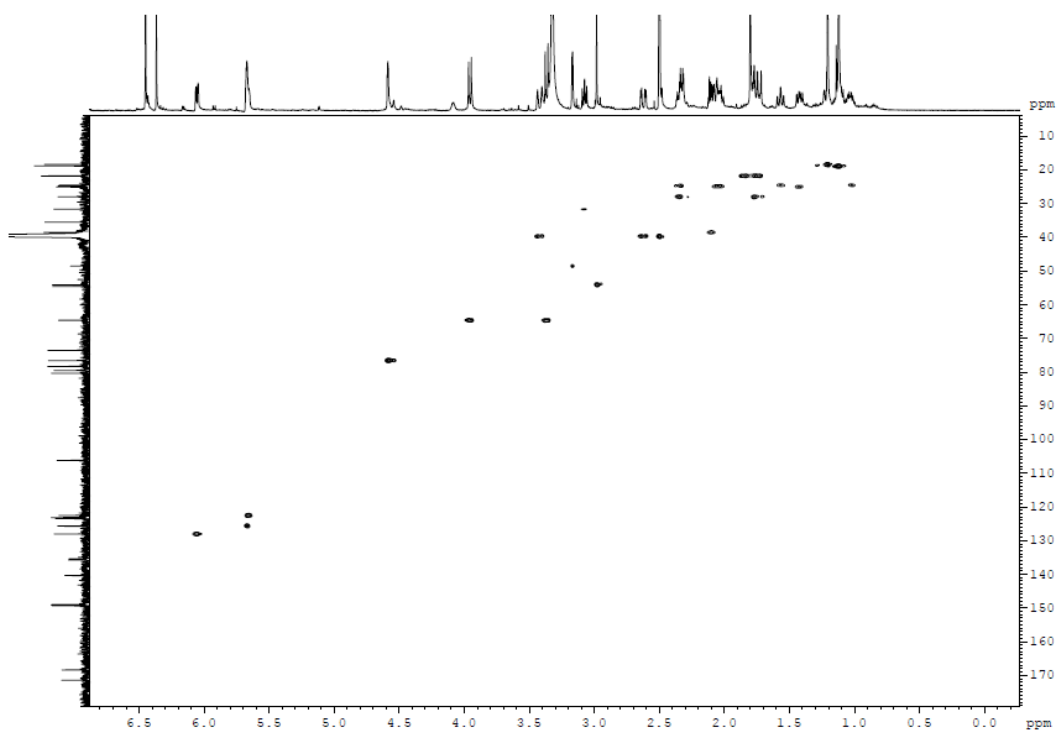

**Supplementary Figure S30.** HSQC spectrum of **4** (600 MHz, DMSO-*d*<sub>6</sub>)

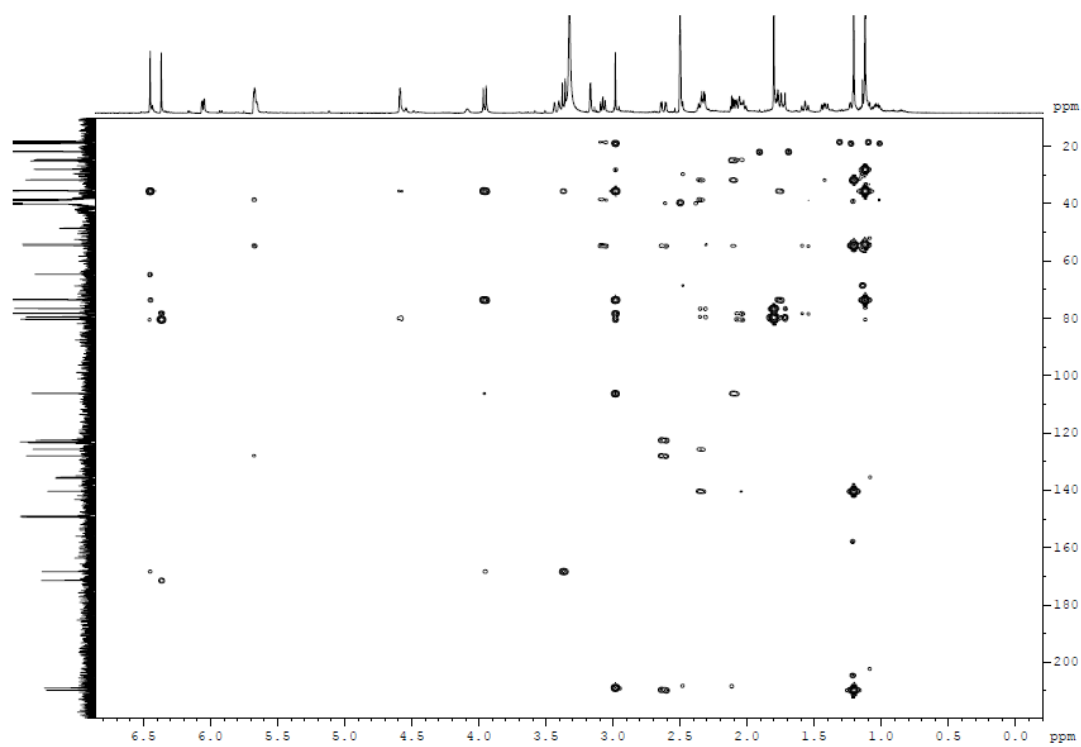

**Supplementary Figure S31.** HMBC spectrum of **4** (600 MHz, DMSO-*d*<sub>6</sub>)

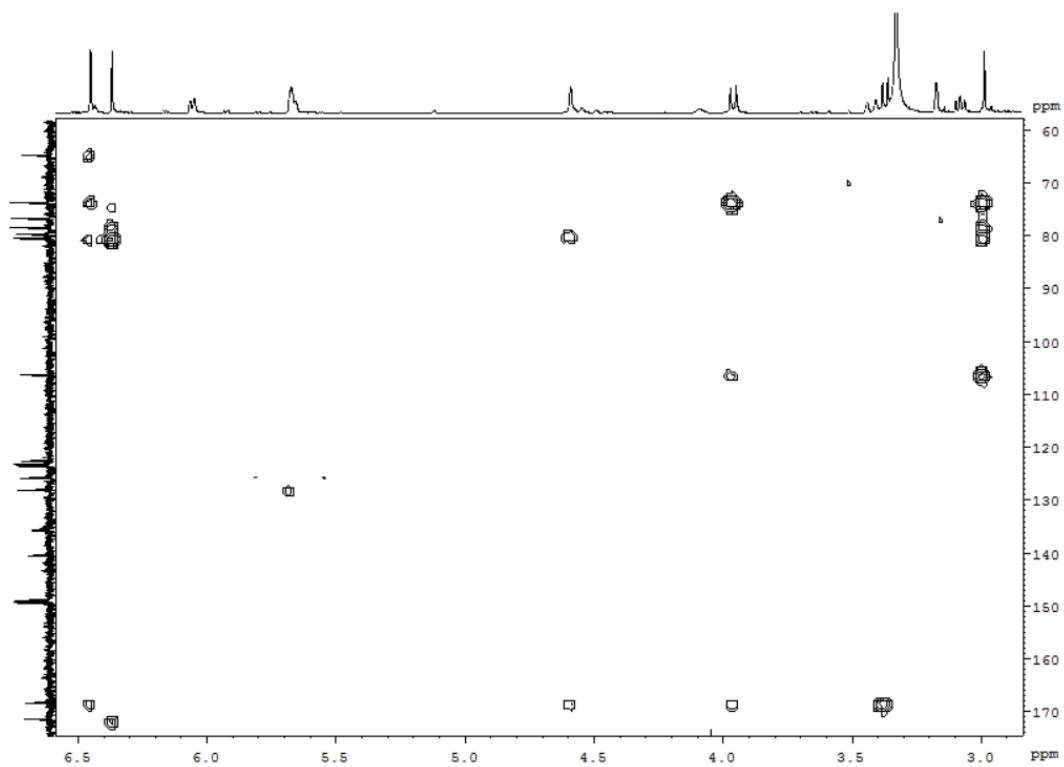

Supplementary Figure S32. Selected HMBC spectrum of **4** (600 MHz, DMSO-*d*<sub>6</sub>)

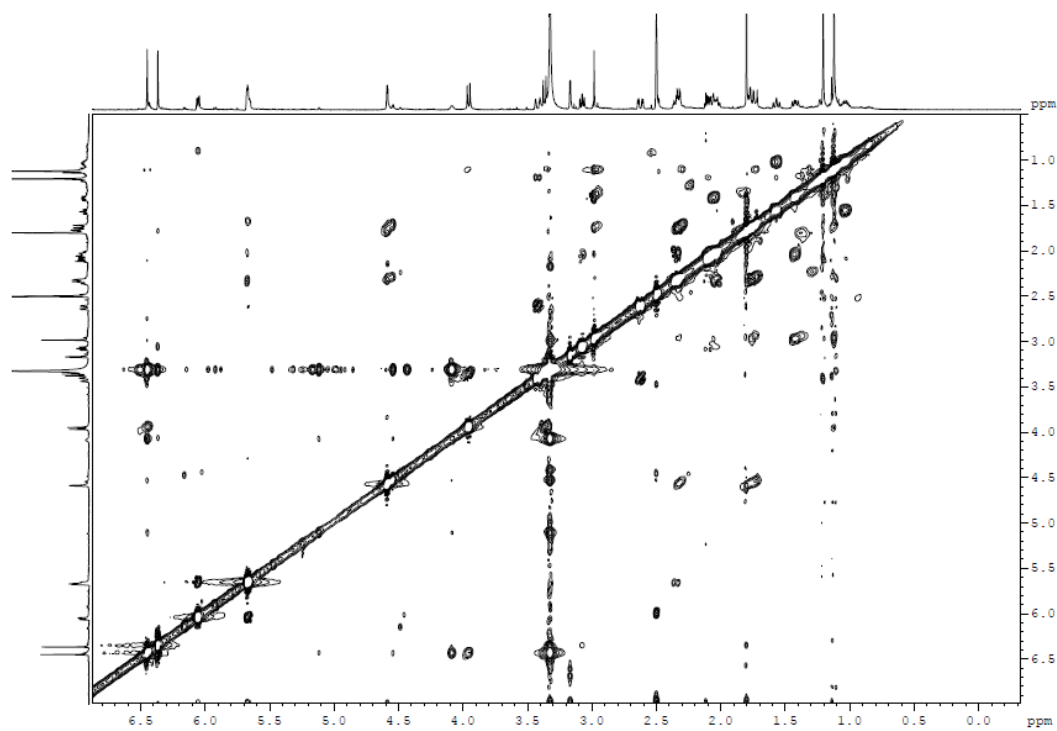

Supplementary Figure S33. NOESY spectrum of **4** (600 MHz, DMSO-*d*<sub>6</sub>)

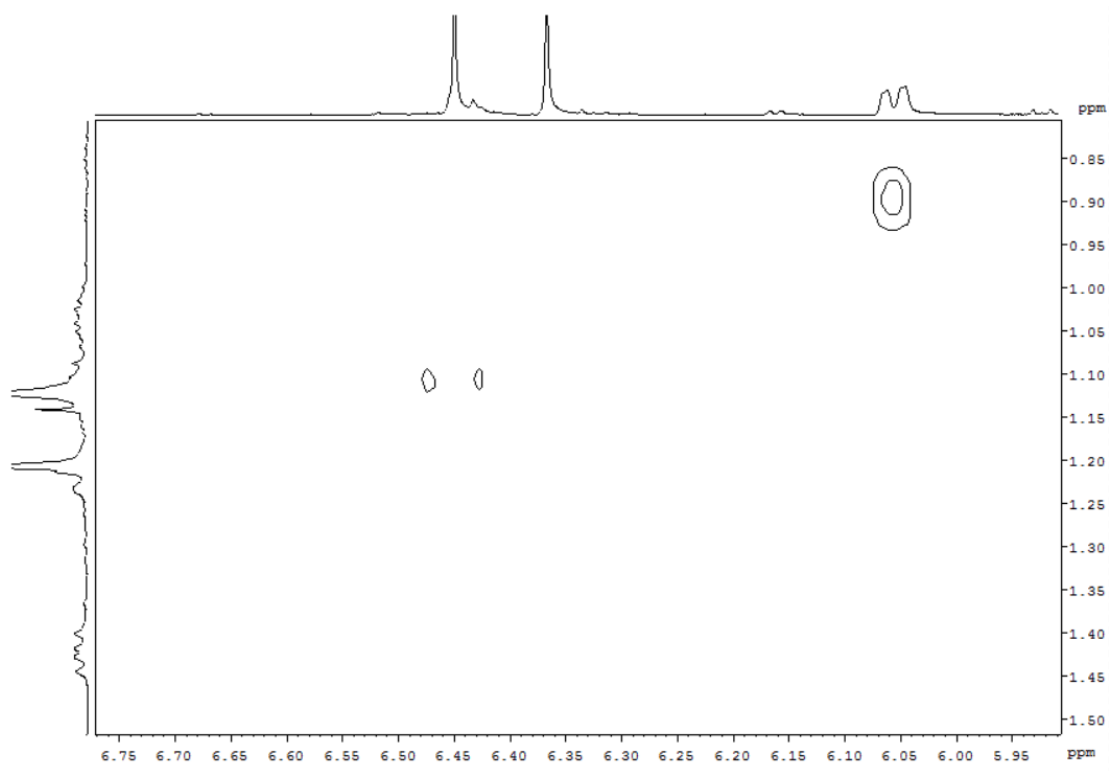

**Supplementary Figure S34.** Selected NOESY spectrum of **4** (600 MHz, DMSO-*d*<sub>6</sub>)

Tolerance = 2.1 PPM / DBE: min = 3.0, max = 50.0  
 Element prediction: Off  
 Number of isotope peaks used for i-FIT = 3

Monoisotopic Mass, Even Electron Ions  
 238 formula(e) evaluated with 1 results within limits (up to 50 closest results for each mass)  
 Elements Used:  
 C: 0-100 H: 0-100 O: 0-200 Na: 0-1  
 SCPs13 neg 24 (0.109)  
 1: TOF MS ES-

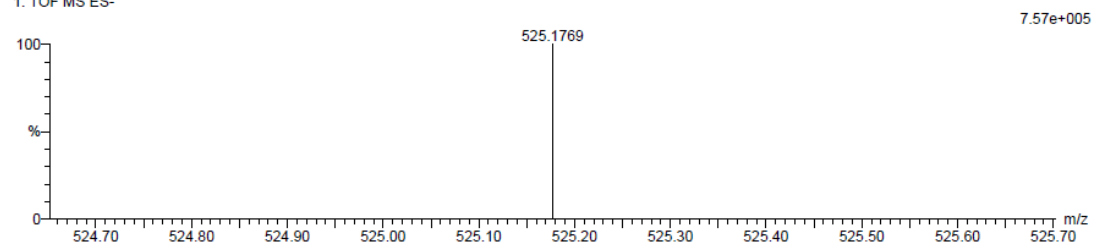

| Mass     | Calc. Mass | mDa | PPM | DBE  | i-FIT | Norm | Conf (%) | Formula                                         |
|----------|------------|-----|-----|------|-------|------|----------|-------------------------------------------------|
| 525.1769 | 525.1761   | 0.8 | 1.5 | 14.5 | 41.9  | n/a  | n/a      | C <sub>28</sub> H <sub>29</sub> O <sub>10</sub> |

**Supplementary Figure S35.** HRESIMS spectrum of **4**



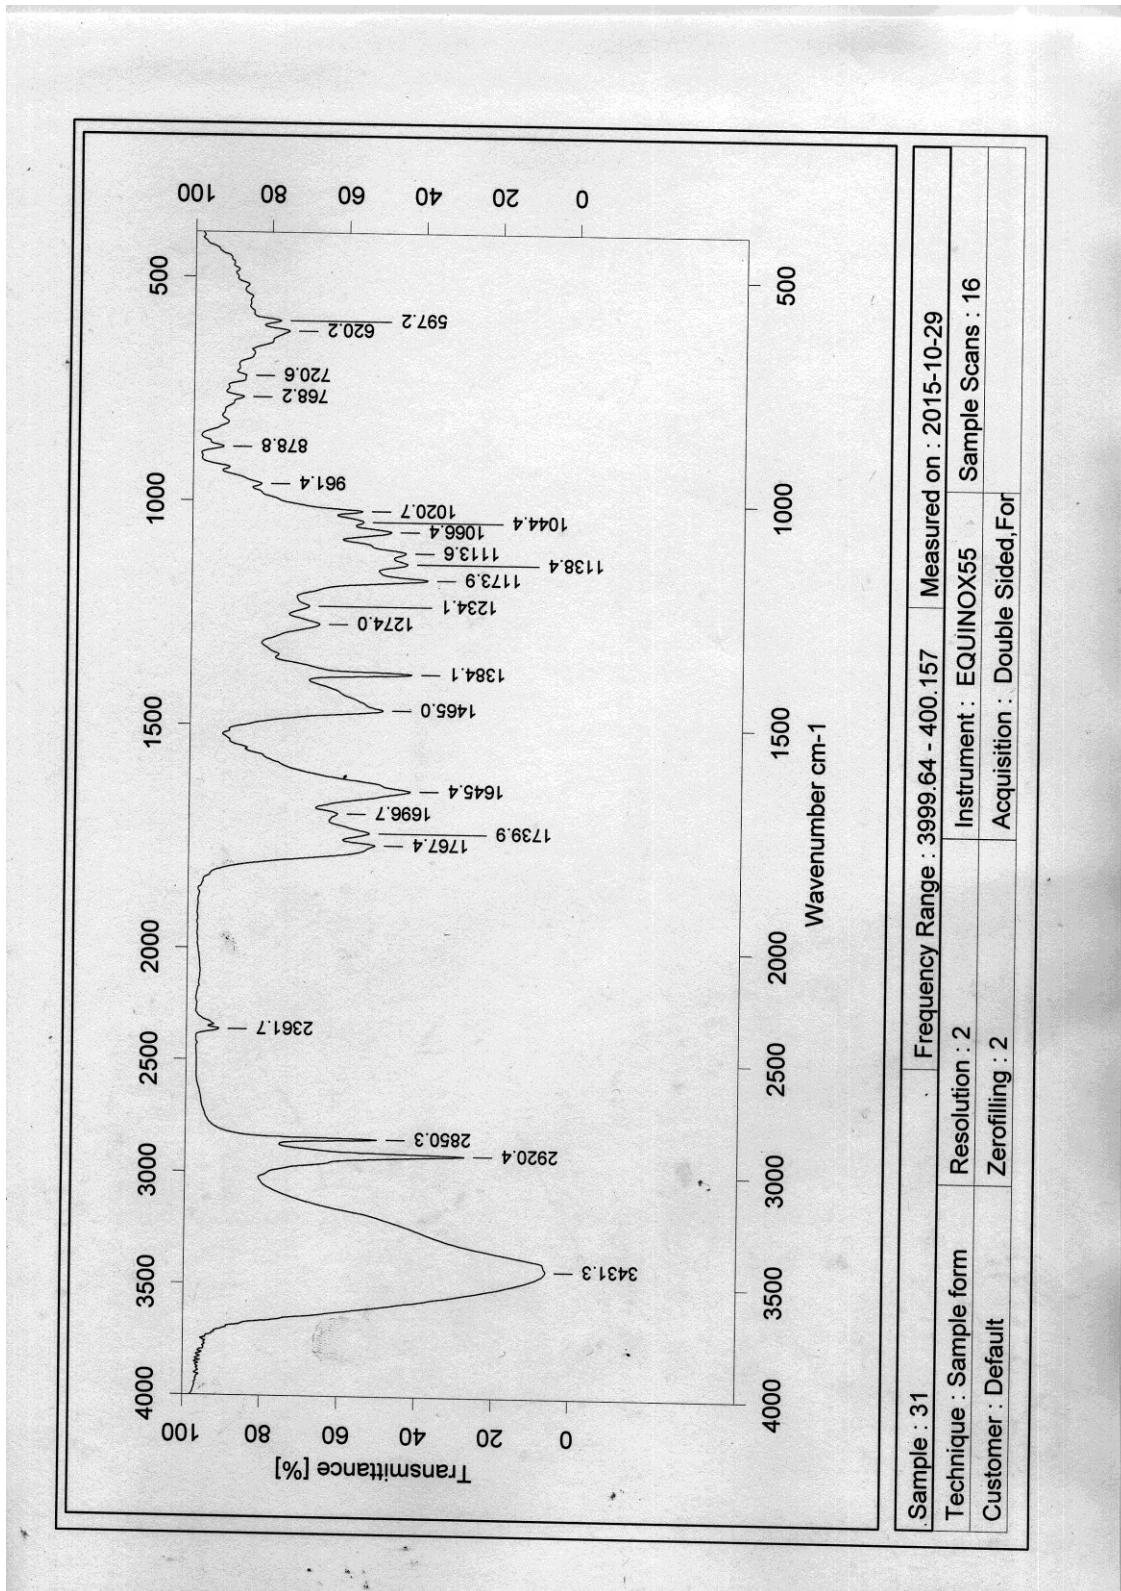

Supplementary Figure S36. IR spectrum of 4

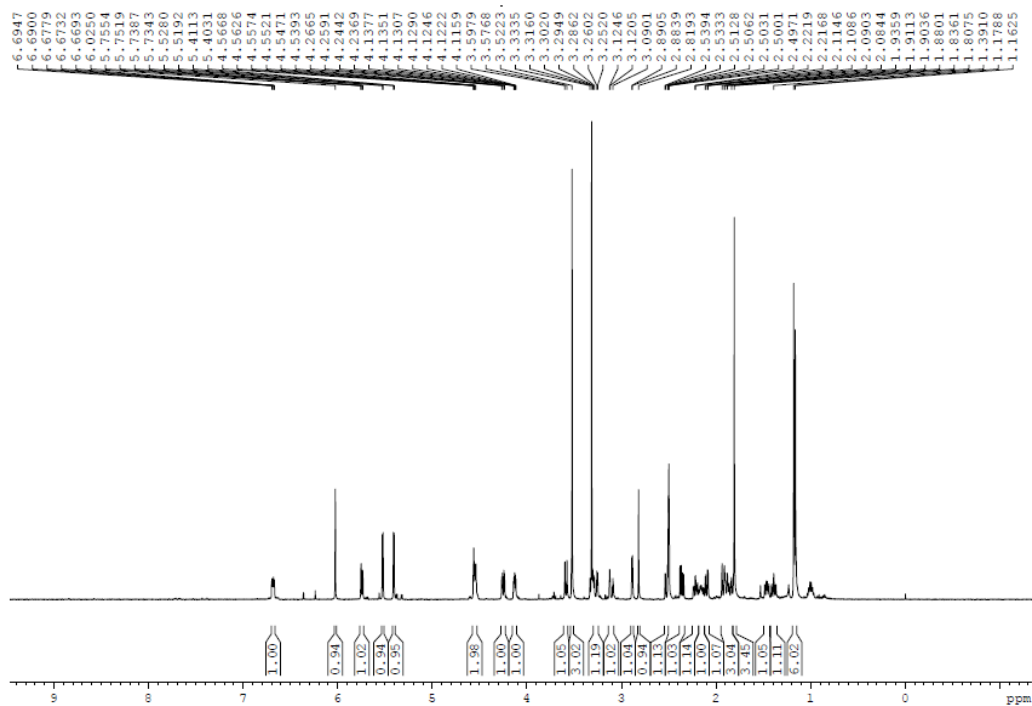

Supplementary Figure S37.  $^1\text{H}$  NMR spectrum of **5** (400 MHz,  $\text{DMSO-}d_6$ )

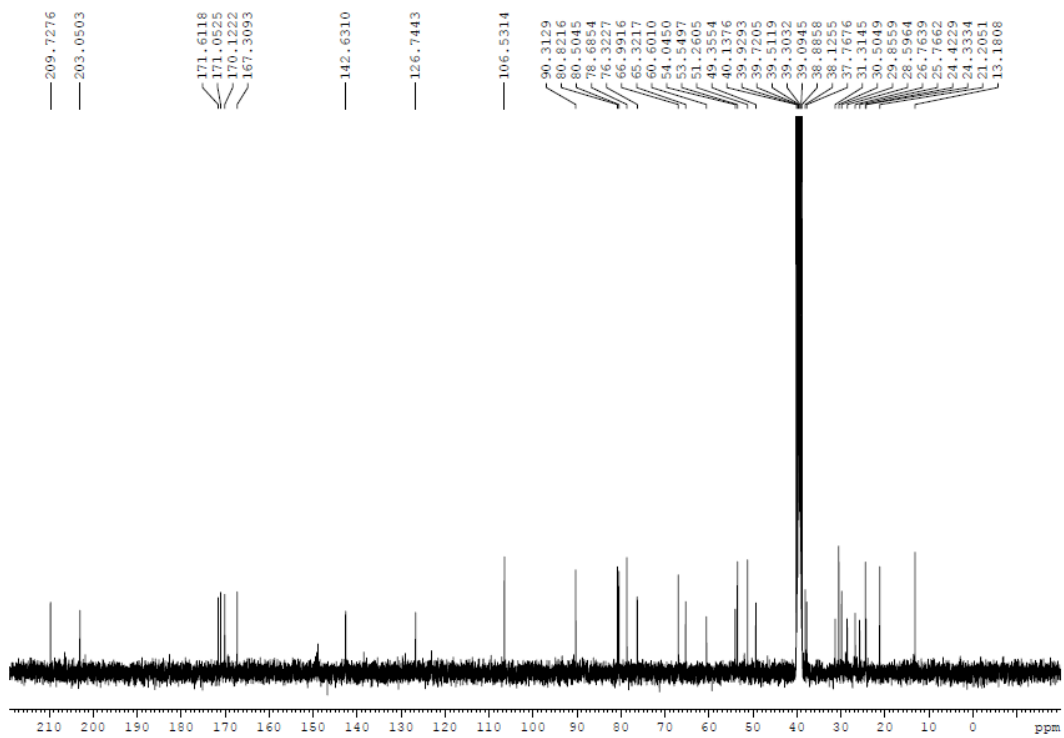

Supplementary Figure S38.  $^{13}\text{C}$  NMR spectrum of **5** (100 MHz,  $\text{DMSO-}d_6$ )

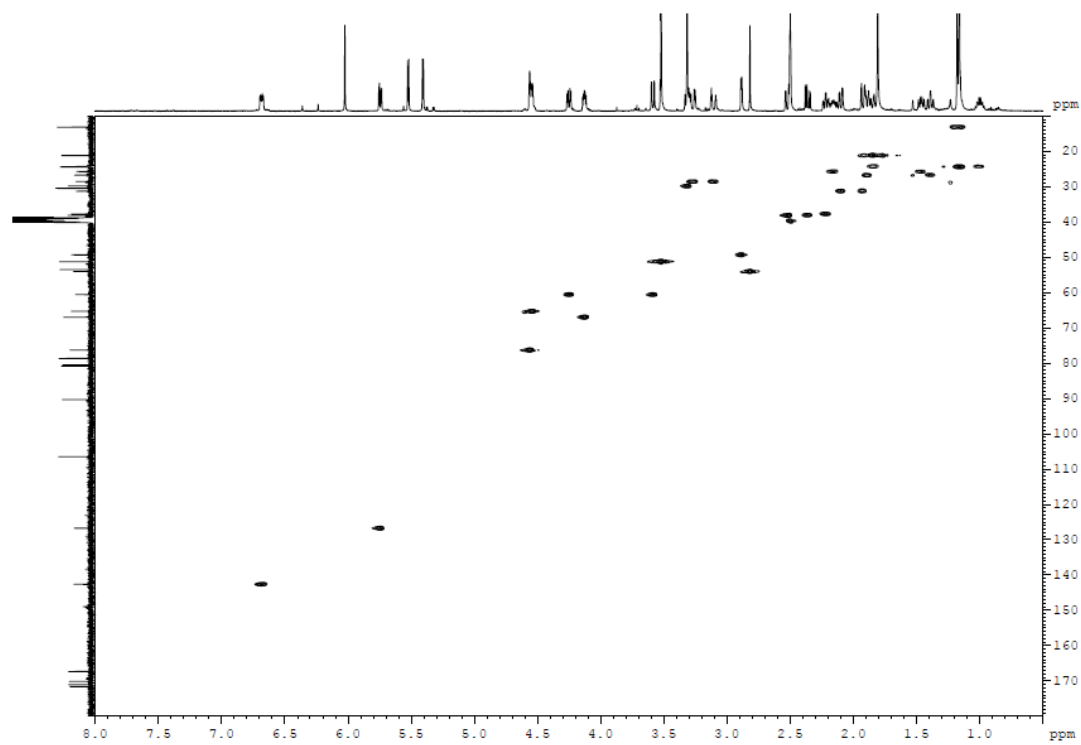

**Supplementary Figure S39.** HSQC spectrum of **5** (600 MHz, DMSO-*d*<sub>6</sub>)

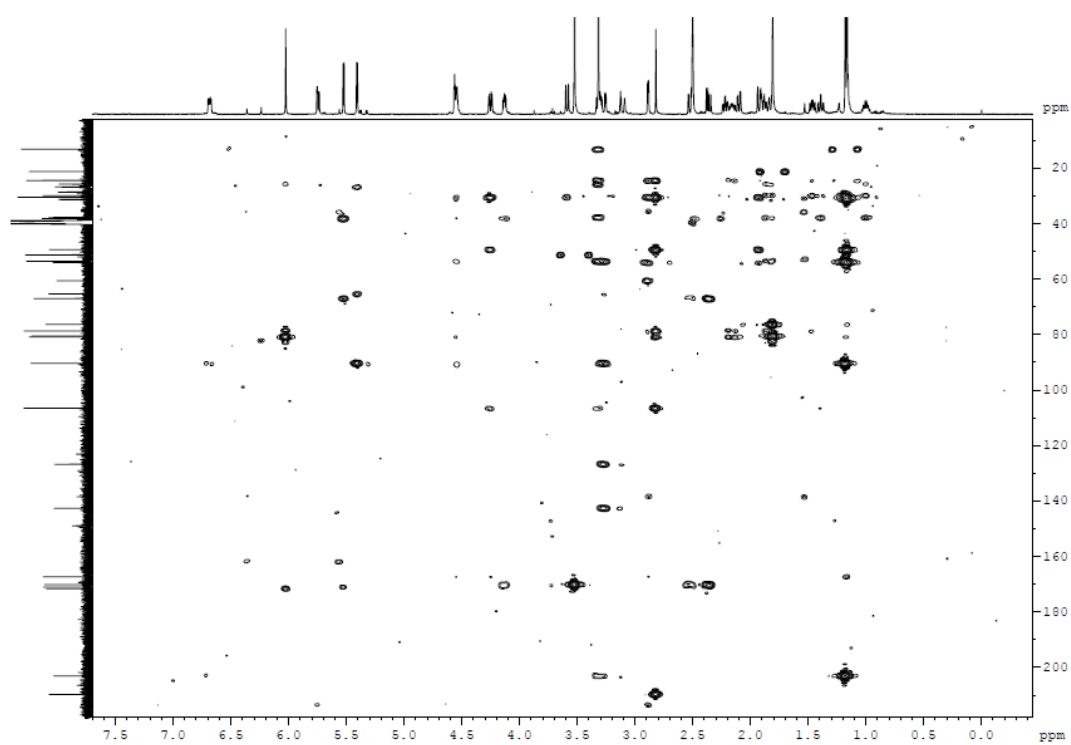

**Supplementary Figure S40.** HMBC spectrum of **5** (600 MHz, DMSO-*d*<sub>6</sub>)

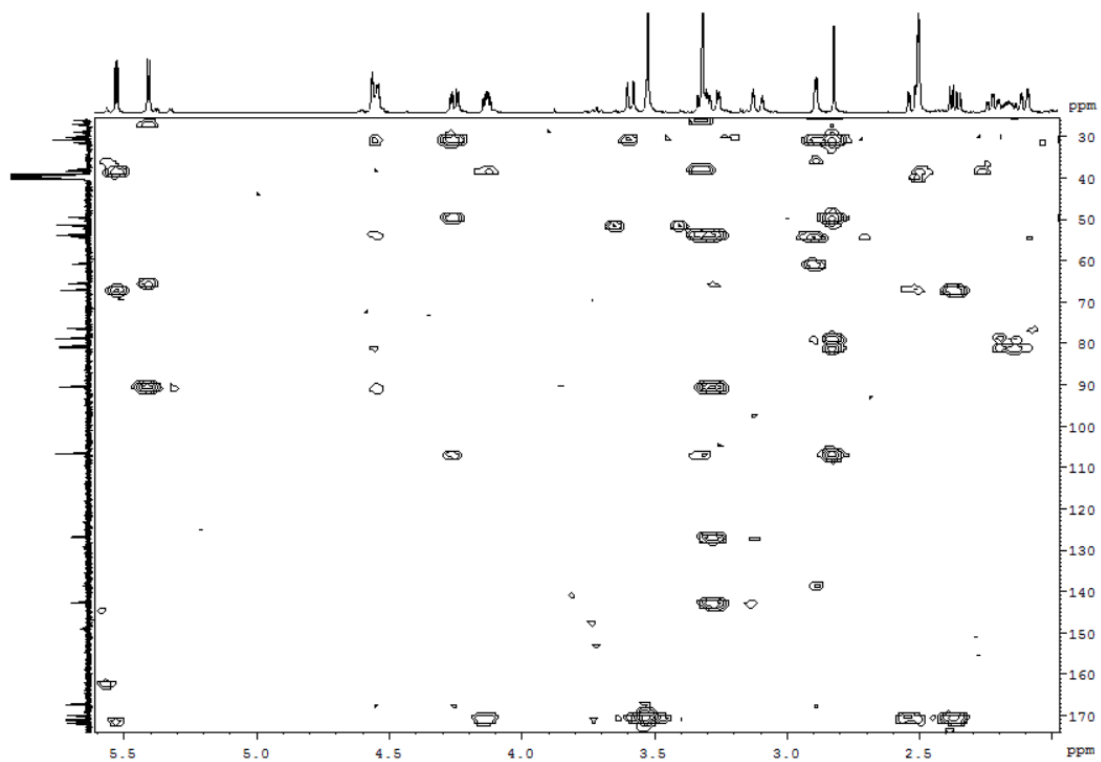

**Supplementary Figure S41.** Selected HMBC spectrum of **5** (600 MHz, DMSO-*d*<sub>6</sub>)

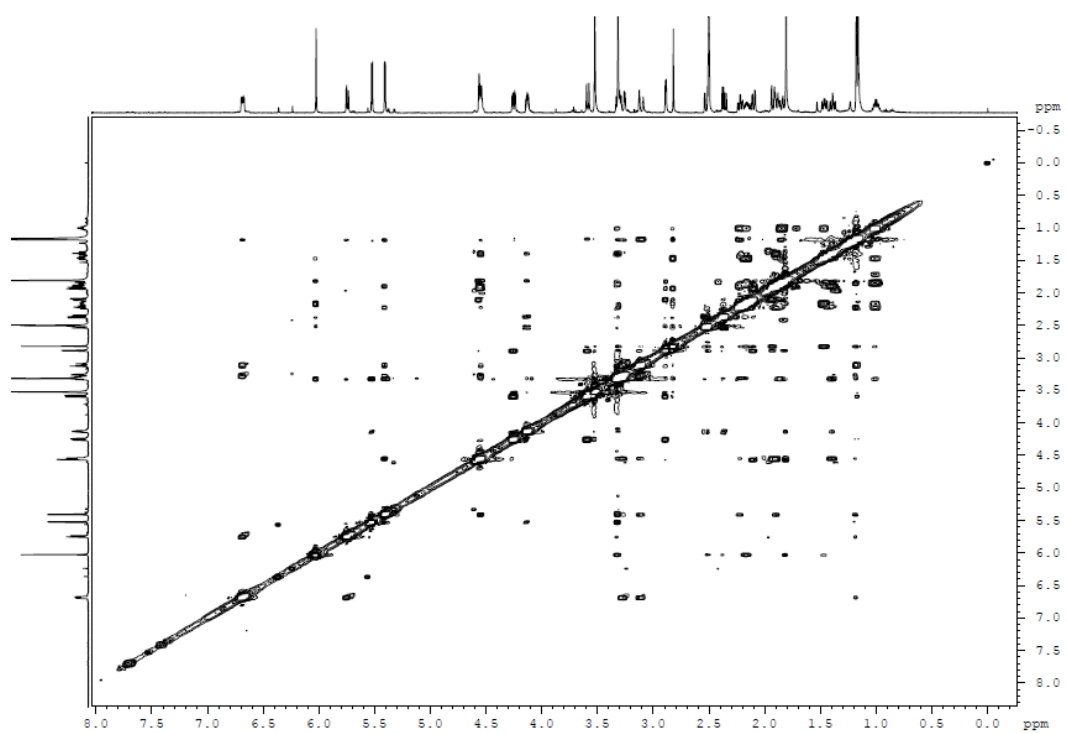

**Supplementary Figure S42.** NOESY spectrum of **5** (600 MHz, DMSO-*d*<sub>6</sub>)

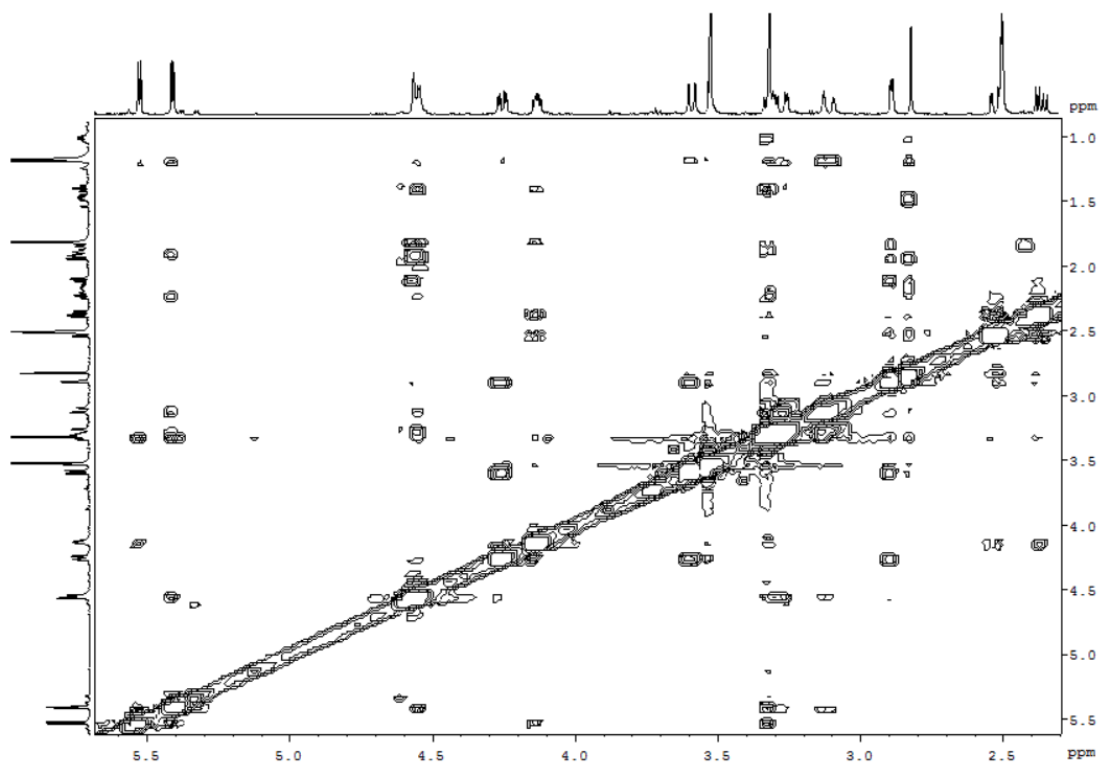

**Supplementary Figure S43.** Selected NOESY spectrum of **5** (600 MHz, DMSO-*d*<sub>6</sub>)

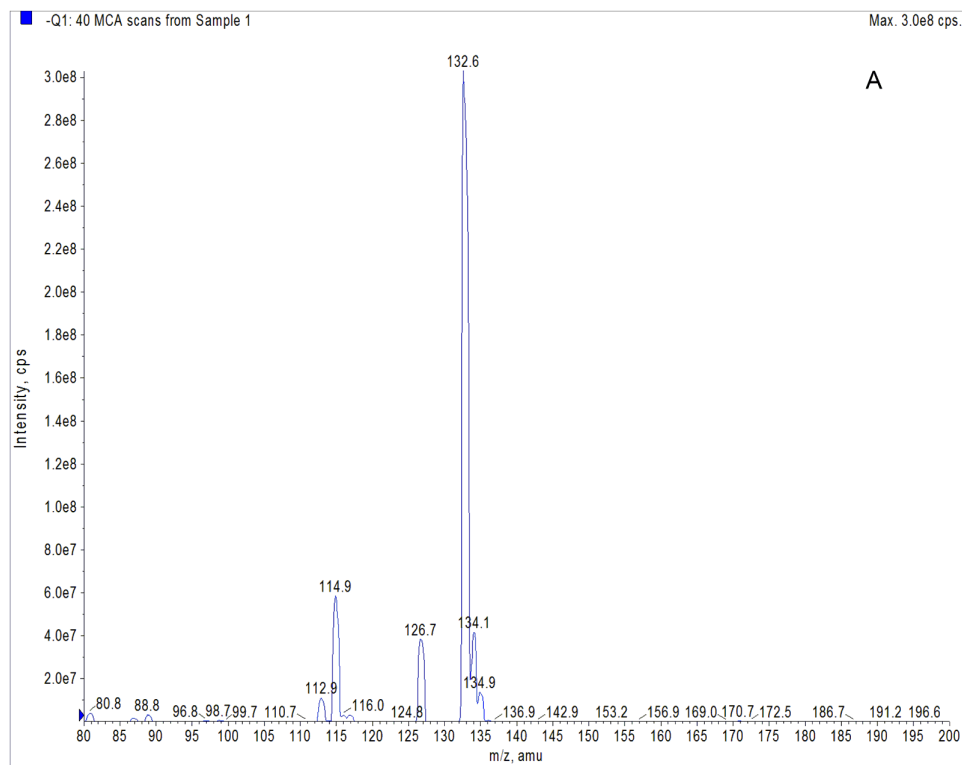

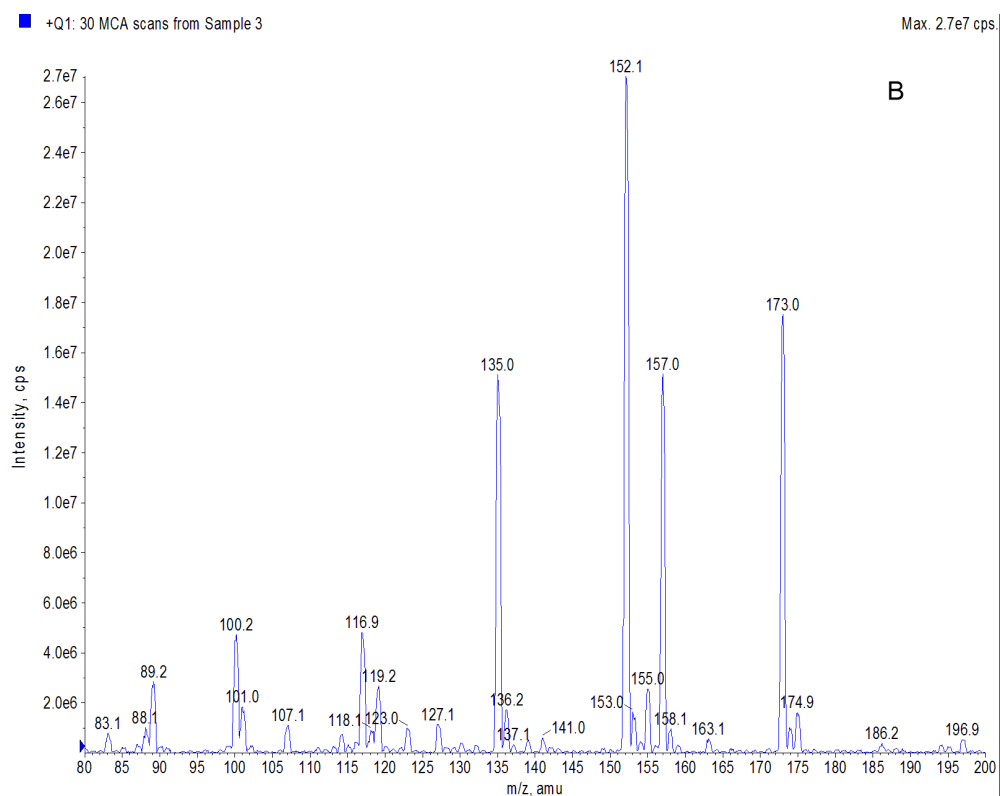

**Supplementary Figure S44.** MS spectrum (A, negative mode; B, positive mode) of the hydrolyzed product for **5**

Tolerance = 2.1 PPM / DBE: min = 3.0, max = 50.0  
Element prediction: Off  
Number of isotope peaks used for i-FIT = 3

Monoisotopic Mass, Even Electron Ions  
380 formula(e) evaluated with 1 results within limits (up to 50 closest results for each mass)  
Elements Used:  
C: 0-100 H: 0-100 O: 0-200 Na: 0-1  
SCPs18 neg 26 (0.116)  
1: TOF MS ES-

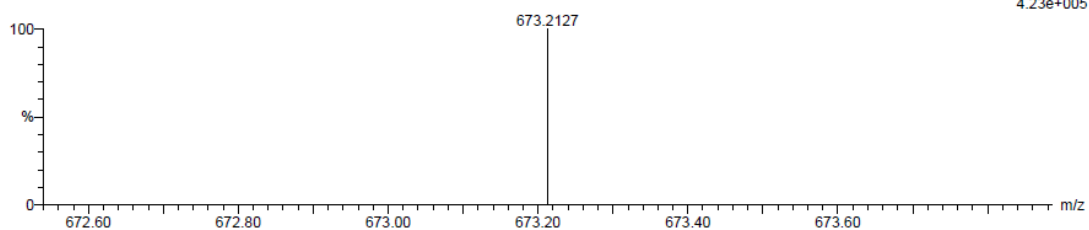

Minimum: 3.0  
Maximum: 4.0 2.1 50.0

| Mass     | Calc. Mass | mDa  | PPM  | DBE  | i-FIT | Norm | Conf (%) | Formula     |
|----------|------------|------|------|------|-------|------|----------|-------------|
| 673.2127 | 673.2132   | -0.5 | -0.7 | 15.5 | 40.4  | n/a  | n/a      | C33 H37 O15 |

**Supplementary Figure S45.** HRESIMS spectrum of **5**

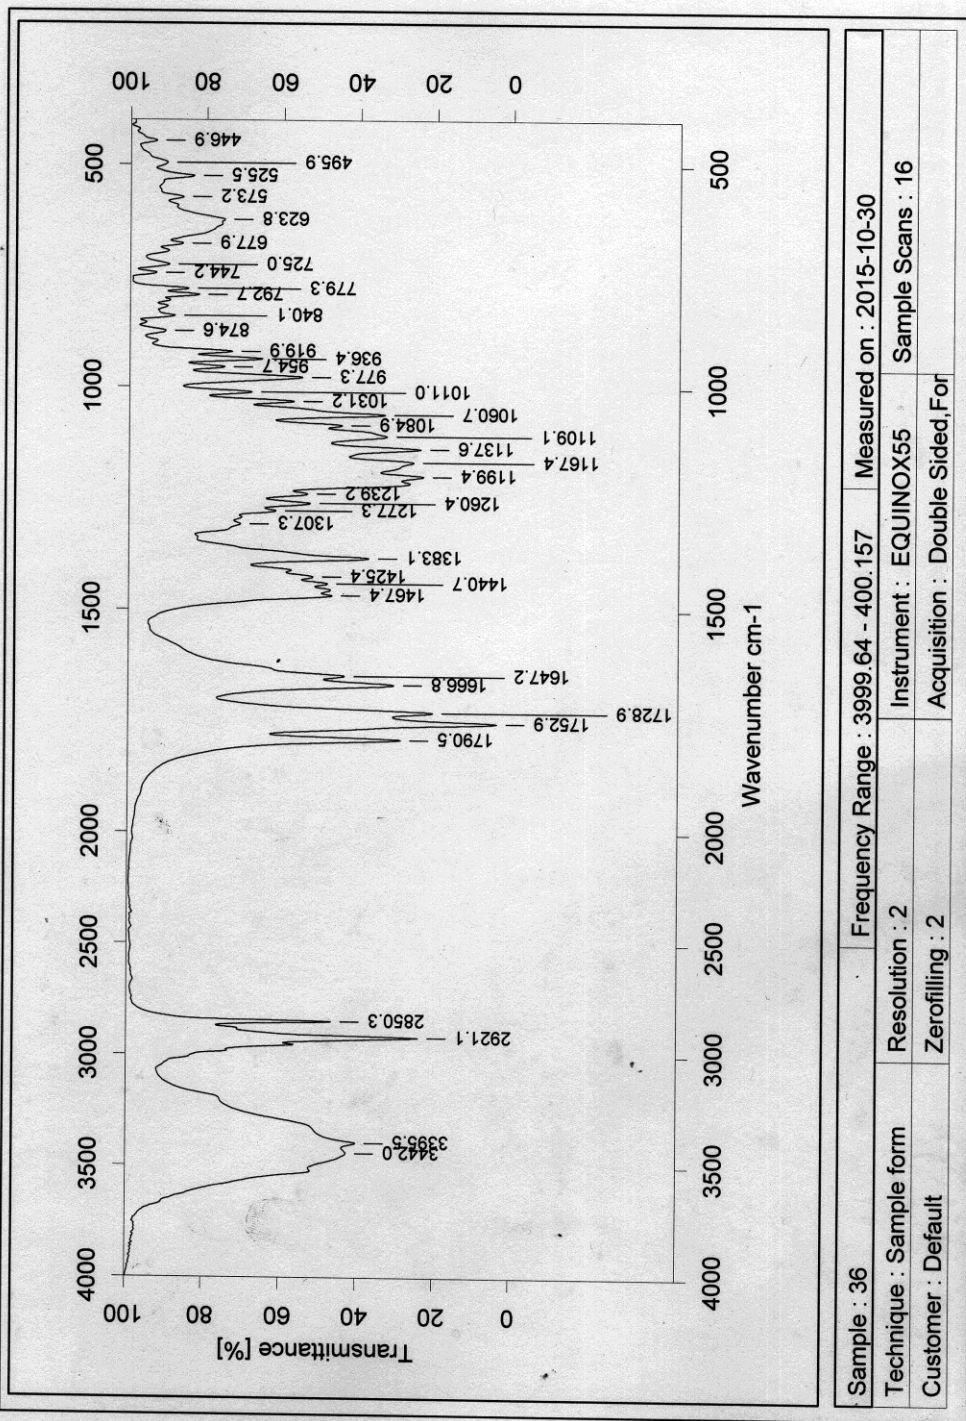

Supplementary Figure S46. IR spectrum of 5



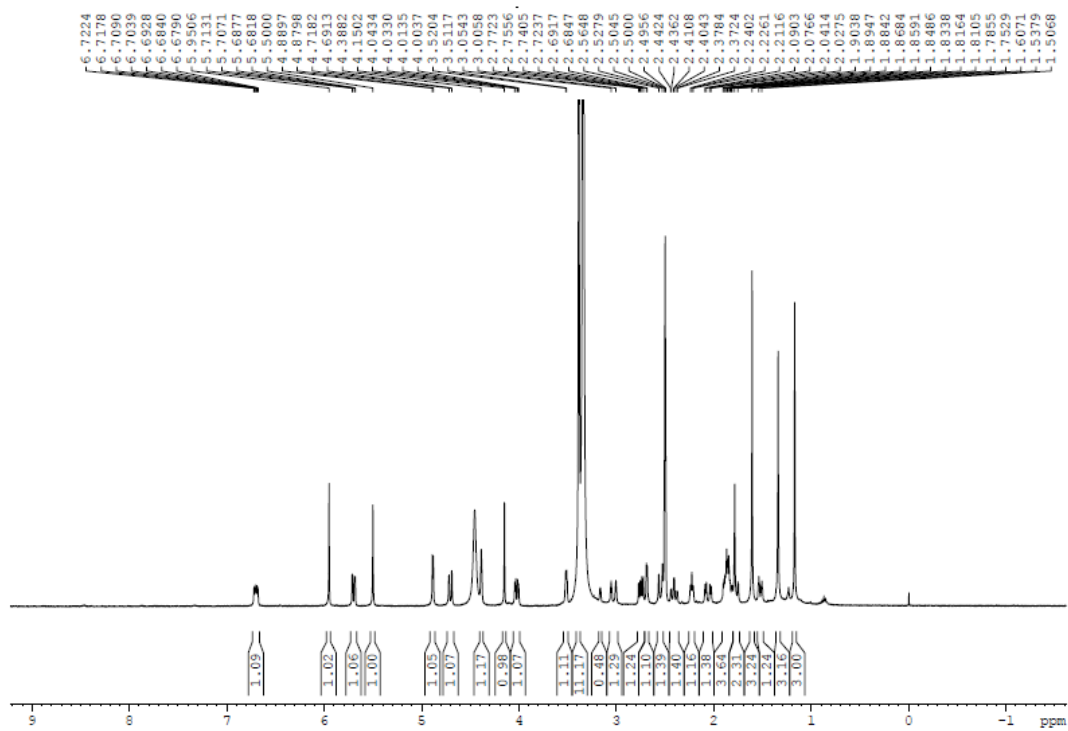

Supplementary Figure S47.  $^1\text{H}$  NMR spectrum of **6** (600 MHz,  $\text{DMSO-}d_6$ )

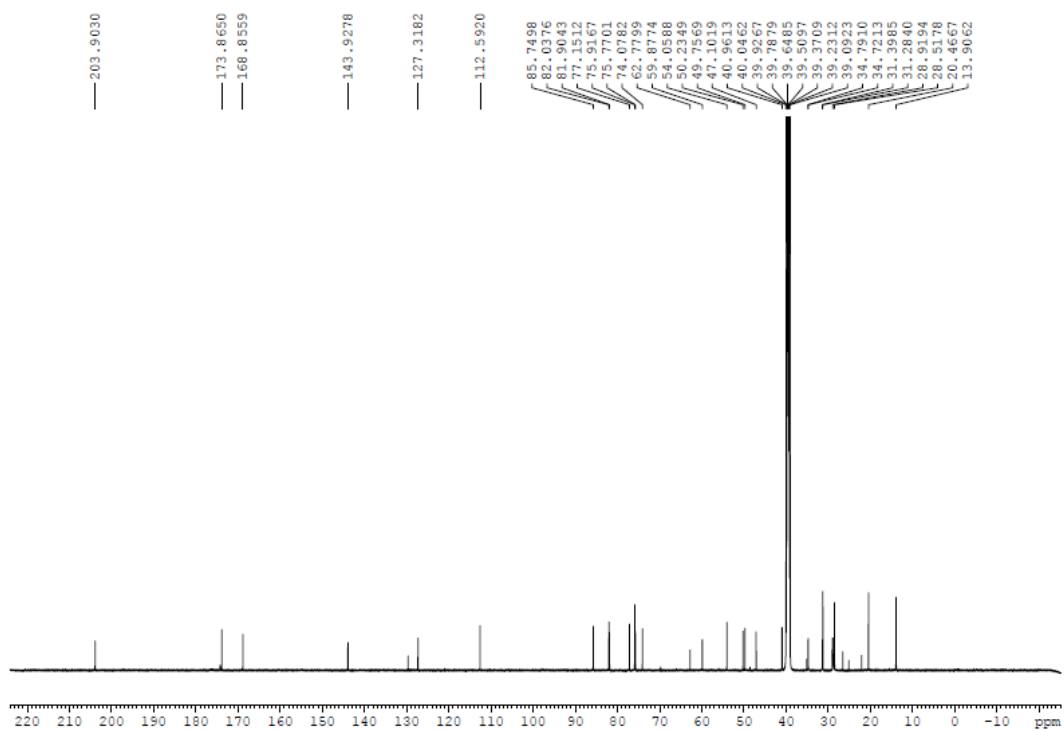

**Supplementary Figure S48.**  $^{13}\text{C}$  NMR spectrum of **6** (150 MHz,  $\text{DMSO}-d_6$ )

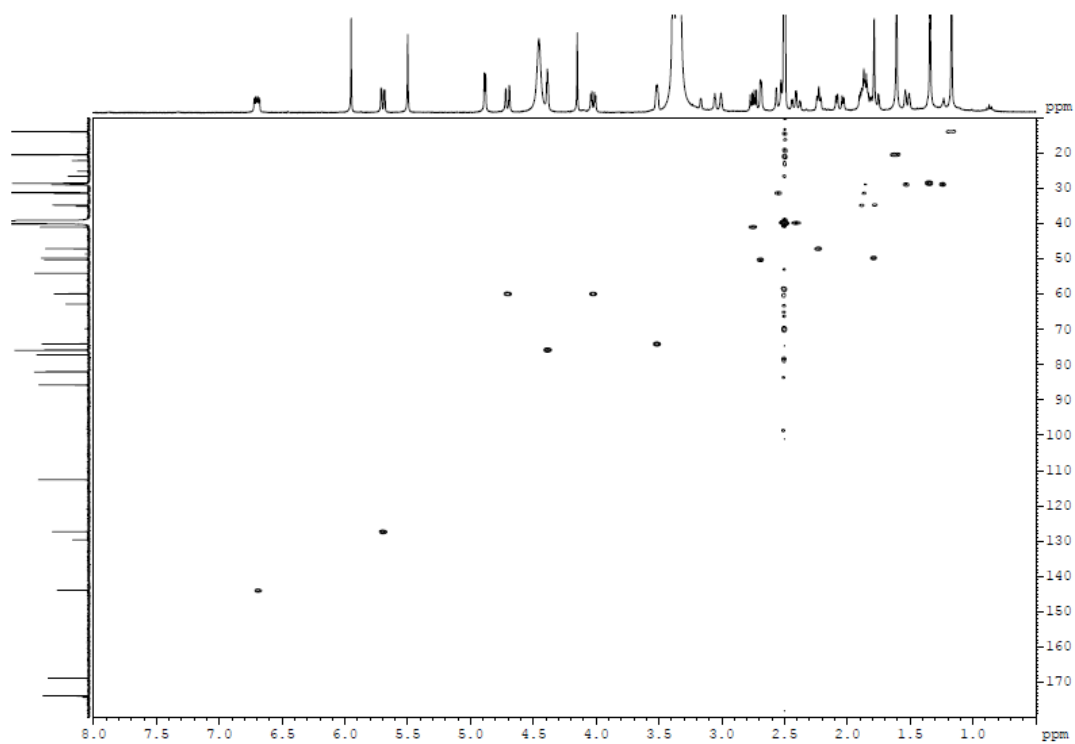

**Supplementary Figure S49.** HSQC spectrum of **6** (600 MHz,  $\text{DMSO}-d_6$ )

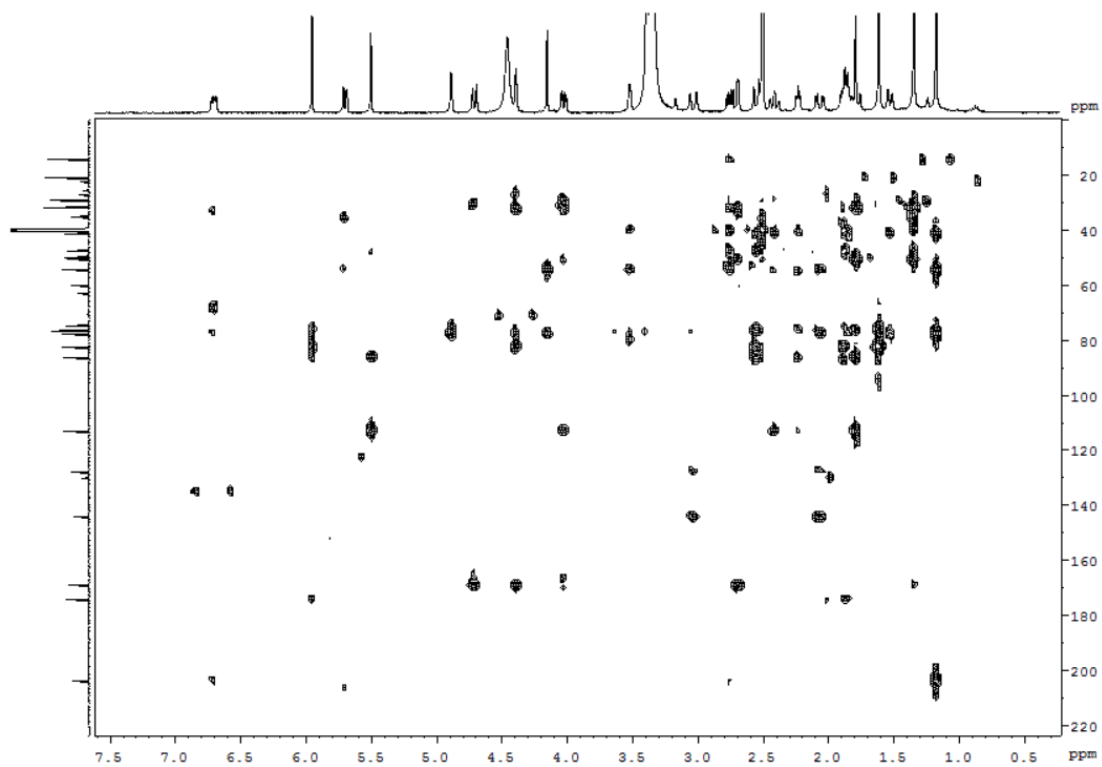

**Supplementary Figure S50.** HMBC spectrum of **6** (600 MHz, DMSO-*d*<sub>6</sub>)

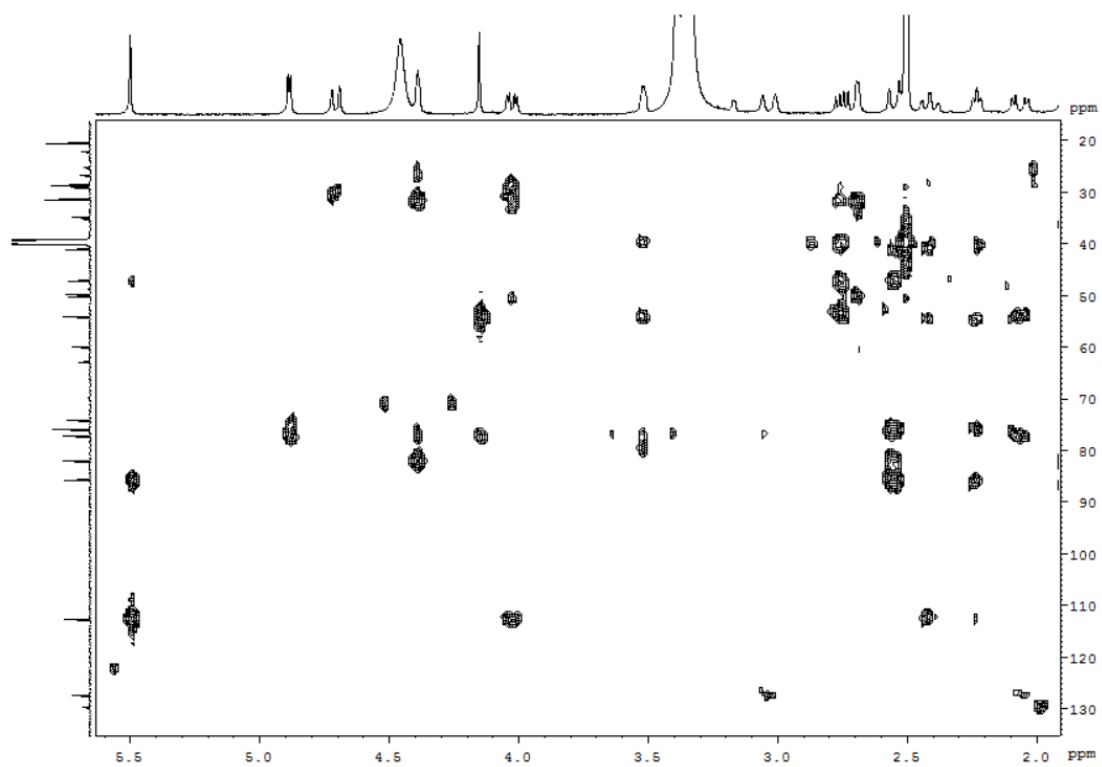

**Supplementary Figure S51.** Selected HMBC spectrum of **6** (600 MHz, DMSO-*d*<sub>6</sub>)

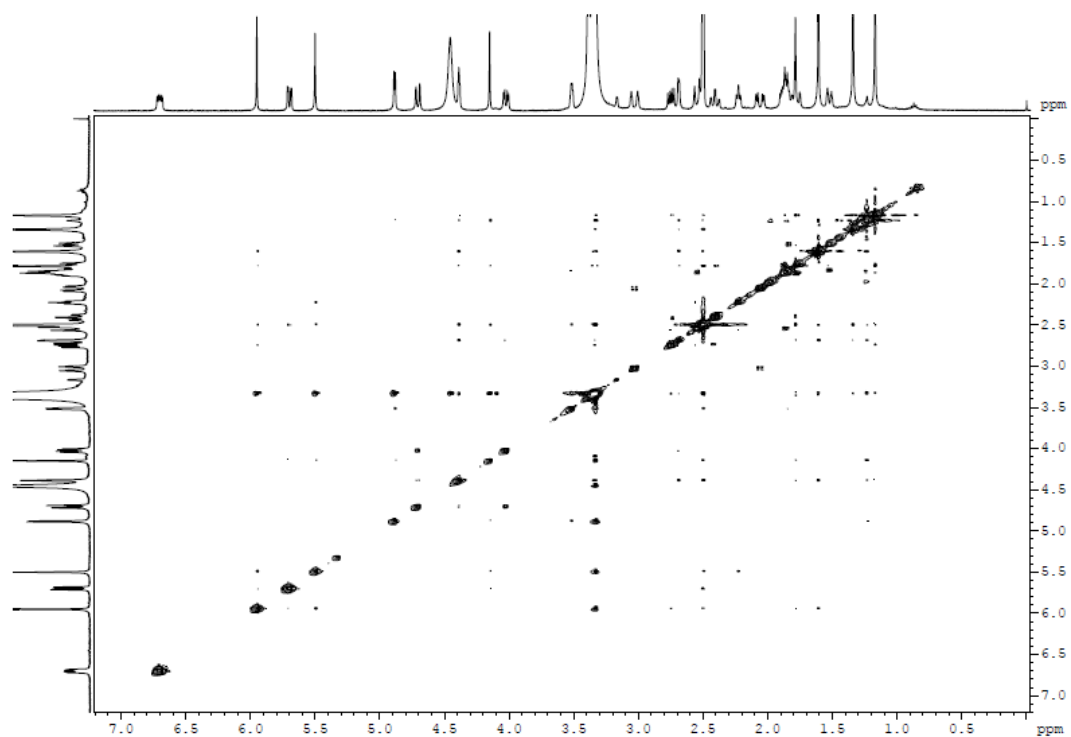

**Supplementary Figure S52.** NOESY spectrum of **6** (600 MHz, DMSO-*d*<sub>6</sub>)

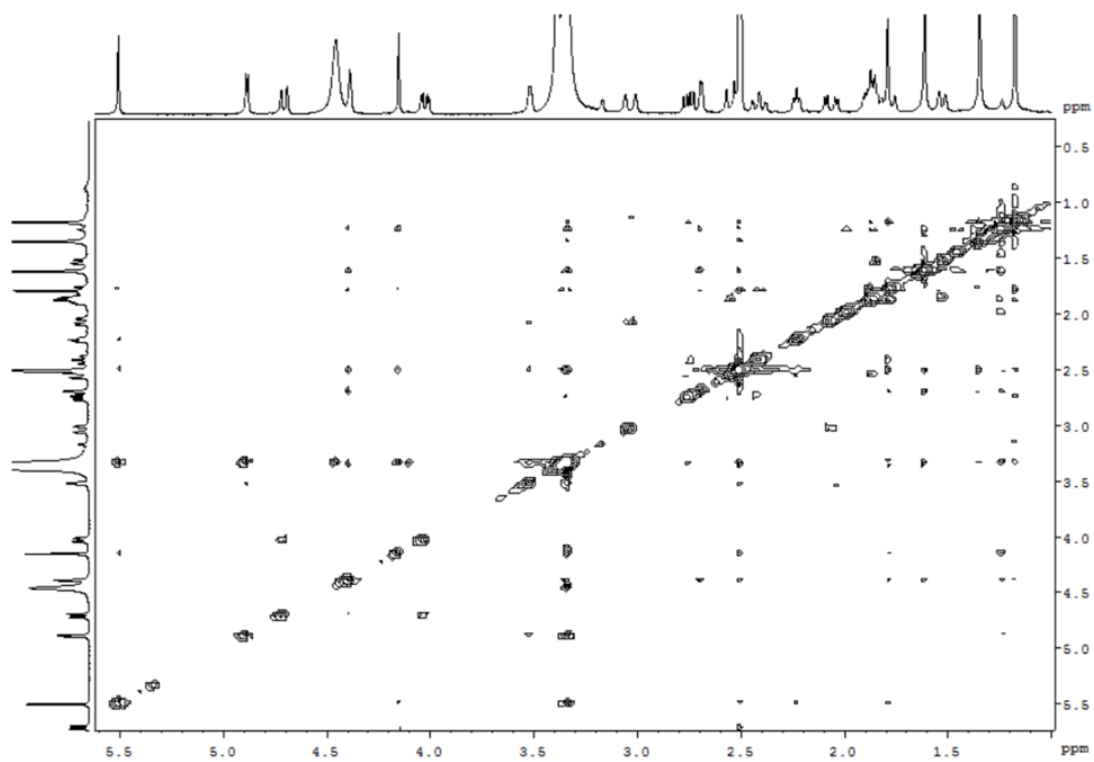

**Supplementary Figure S53.** Selected NOESY spectrum of **6** (600 MHz, DMSO-*d*<sub>6</sub>)

Tolerance = 5.0 PPM / DBE: min = 3.0, max = 50.0  
Element prediction: Off  
Number of isotope peaks used for i-FIT = 3

Monoisotopic Mass, Even Electron Ions  
234 formula(e) evaluated with 1 results within limits (up to 50 closest results for each mass)  
Elements Used:  
C: 0-38 H: 0-100 O: 0-200 Na: 0-1  
SY0923pos16 24 (0.109)  
1: TOF MS ES+

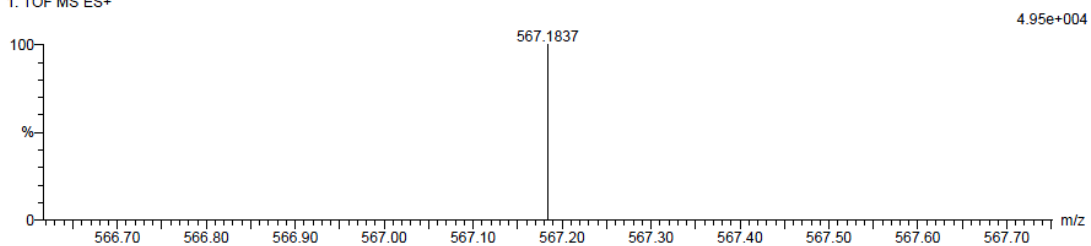

| Minimum: |            |      |      | 3.0  |       |      |          |                |  |
|----------|------------|------|------|------|-------|------|----------|----------------|--|
| Maximum: |            | 4.0  | 5.0  | 50.0 |       |      |          |                |  |
| Mass     | Calc. Mass | mDa  | PPM  | DBE  | i-FIT | Norm | Conf (%) | Formula        |  |
| 567.1837 | 567.1842   | -0.5 | -0.9 | 12.5 | 34.4  | n/a  | n/a      | C28 H32 O11 Na |  |

**Supplementary Figure S54.** HRESIMS spectrum of **6**
